# Supplementary material
Source: PubMed Central journal article supplement (PMC6951826)

YMTHE, Volume 28

## **Supplemental Information**

**The MicroRNA-92a/Sp1/MyoD Axis Regulates**

**Hypoxic Stimulation of Myogenic Lineage**

**Differentiation in Mouse Embryonic Stem Cells**

**Seo-Yeon Lee, Jimin Yang, Jung Hwa Park, Hwa Kyoung Shin, Woo Jean Kim, Su-Yeon Kim, Eun Ju Lee, Injoo Hwang, Choon-Soo Lee, Jaewon Lee, and Hyo-Soo Kim**

## Supplementary Figure legends

**Supplementary Figure S1. Effect of HIF1 $\alpha$  or HIF2 $\alpha$  overexpression on HIF-responsive genes in C57 ESCs under normoxia.** Quantitative real-time PCR for bFGF and VEGF suggests that HIF plasmids were functional (n = 3; \*\*p < 0.01, \*\*\*p < 0.001). ESCs were transfected with 1  $\mu$ g pEGFP-HIF1 $\alpha$  or pEGFP-HIF2 $\alpha$  for 24 h, allowed to form EBs for 3 days under normoxic conditions, and real-time PCR were performed.

**Supplementary Figure S2. Real-time PCR for *Sp1* and *MyoD*.** (A) *Sp1* mRNA was significantly decreased by the transient transfection of shSp1 compared to that with the non-target shRNA control (shMock) (n = 4). (B) Sp1 knockdown suppressed the increased expression of *MyoD* mRNA even under hypoxia (n = 4). \*\*\*p < 0.001 versus Nor-EBs ###p < 0.001 versus Hyp-shMock-EBs. ESCs were transfected with 1  $\mu$ g shMock or shSp1 for 24 h, formed EBs for 3 days under normoxia, and further incubated for 16 h under normoxic or hypoxic conditions.

**Supplementary Figure S3. Generation of Sp1-knockdown stable cells.** *Sp1* mRNA was remarkably reduced in all four Sp1 knockdown C57 EB clones. C57 ESCs were transfected with 1  $\mu$ g shMock or shSp1 for 24 h, and further selected by puromycin treatment.

**Supplementary Figure S4.** Quantification of western blotting for Sp1. C57 ESCs were transfected with miRNA mimic-oligomer for 2 days under normoxic conditions, and western blotting was performed. miR-NC: miRNA-negative control; n=3, \*\*p<0.01, \*\*\*p<0.001).

**Supplementary Table 1.** Primers used for real-time PCR and ChIP assay

| Primer        |         | Sequence                     | Size (bp) |
|---------------|---------|------------------------------|-----------|
| Sp1           | Forward | 5'-CACCCCTAACACCCATTGCCT-3'  | 187       |
|               | Reverse | 5'-TCCATGATCACCTGGGGTGT-3'   |           |
| MyoD          | Forward | 5'-TGGAGATCCTGCGCAACGCC-3'   | 138       |
|               | Reverse | 5'-TGTAGTGCTCGCTGCCACGG-3'   |           |
| Myf5          | Forward | 5'-CCACCATGCGCGAGCGTAGA-3'   | 194       |
|               | Reverse | 5'-GCTCTGTCCCGGCAGGCTGTA-3'  |           |
| MyoG          | Forward | 5'-CTGCGCAGCGCCATCCAGTA-3'   | 222       |
|               | Reverse | 5'-GGCGTCTGTAGGGTCAGCCG-3'   |           |
| AP2 $\alpha$  | Forward | 5'-CTCCAGAAGGGGTGTGCAT-3'    | 171       |
|               | Reverse | 5'-CGGGCCTGAAGAGGTTACTC-3'   |           |
| HIF1 $\alpha$ | Forward | 5'-TCCTGGAAACGAGTGAAAGG-3'   | 176       |
|               | Reverse | 5'-CTGCCTTGTATGGGAGCATT-3'   |           |
| HIF2 $\alpha$ | Forward | 5'-CTTGGAGGGTTTCATTGCTG-3'   | 246       |
|               | Reverse | 5'-ACCGTGCACCTTCATCCTCAT-3'  |           |
| 18s rRNA      | Forward | 5'-GTAACCCGTTGAACCTT-3'      | 151       |
|               | Reverse | 5'-CCATCCAATCGGTAGTAGCG-3'   |           |
| OCT4          | Forward | 5'-GAAGCCCTCCCTACAGCAGA-3'   | 437       |
|               | Reverse | 5'-CAGAGCAGTGACGGGAACAG-3'   |           |
| VEGF          | Forward | 5'-CGGATCAAACCTCACCAAAG-3'   | 131       |
|               | Reverse | 5'-TTTCTCCGCTCTGAACAAGG-3'   |           |
| bFGF          | Forward | 5'-TCAAGGACCCCAAGCGGCTC-3'   | 170       |
|               | Reverse | 5'-GTACCGGTTGGCACACACTC-3'   |           |
| ChIP-MyoD     | Forward | 5'-GTCTCTCTGCCCTCCTTCCTA-3'  | 185       |
|               | Reverse | 5'-TATCCAGGGTAGCCTAAAAGCC-3' |           |
| ChIP-NC       | Forward | 5'-GCCCACCCAACCCCATCTT-3'    | 226       |
|               | Reverse | 5'-CCTCTTTCCTGAACTTGCCCT-3'  |           |

**Supplementary Table 2.** Primers for cloning

|                                                                                                                                                                                                                                                                               |
|-------------------------------------------------------------------------------------------------------------------------------------------------------------------------------------------------------------------------------------------------------------------------------|
| <p>pcDNA3.1-Sp1</p> <p>For: 5'-GGTACCCACCATGAGCGACCAAGATCACTCCAT-3'</p> <p>Rev: 5'-CTCGAGCCTTCTAATCTTAGAAACCATTGCCAC-3'</p>                                                                                                                                                   |
| <p>pGL4-MyoD promoter region</p> <p>For: 5'- GGTACCTTTTAATGATGATTCCCCTACTA-3'</p> <p>Rev: 5'- CTCGAGCGTGAGAGTCGTCTTAAC TTT -3'</p>                                                                                                                                            |
| <p>pGL4-MyoD promoter region- Δ1mt</p> <p>For: 5'- GGTACCTACACTCCTATTGGC -3'</p> <p>Rev: 5'- CTCGAG CGTGAGAGTCGTCTTAAC TTT -3'</p>                                                                                                                                            |
| <p>pGL4-MyoD promoter region- Δ2mt</p> <p>For: 5'- GGTACCTTTTAATGATGATTCCCCTACTA -3'</p> <p>Rev: 5'- CTCGAGGCCTCAAGCCAATAG -3'</p>                                                                                                                                            |
| <p>psiCHECK-2-Sp1-3'UTR-WT-Fragment A</p> <p>For: 5'-GGTACCGATTAGACACCCAGTGCCAGAGACA-3'</p> <p>Rev: 5'-CTCGAGTGAGCGGCTCACAGACAGGGAG-3'</p>                                                                                                                                    |
| <p>psiCHECK-2-Sp1-3'UTR-WT-Fragment B</p> <p>For: 5'-GGATCCAGTTACAAGCCGGCTTCGAGATGC-3'</p> <p>Rev: 5'-AAGCTTACAAAGGAGCTACAGACTACATTG-3'</p>                                                                                                                                   |
| <p>psiCHECK-2-Sp1-3'UTR-Fragment B – mt1 (3737–3765)</p> <p>For: 5'-GACGCTGCAGATCTTTGTA<u>AAATTAACCTA</u>-3'</p> <p>Rev: 5'-TAGGTTA<u>ATTT</u>TACAAAGATCTGCAGCGTC-3'</p> <p>(Underline indicates mutations introduced at the miR-92a seed region of the <i>Sp1</i> 3'UTR)</p> |

psiCHECK-2-Sp1-3'UTR-Fragment B – mt2 (4983–5011)

For: 5'-CCAGTTTATCTTTCTTAATACTAATCCGGACC-3'

Rev: 5'-GGTCCGGATTAGTATTAAGAAAGATAAACTGG-3'

(Underline indicates mutations introduced at the miR-92a seed region of the *Sp1* 3'UTR)

# Supplementary Figure S1

(A)

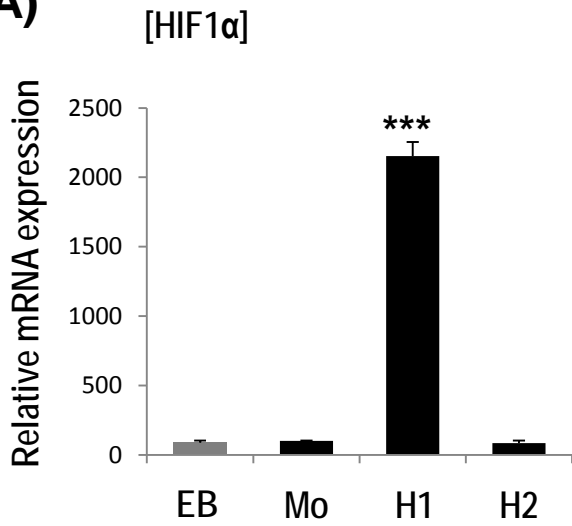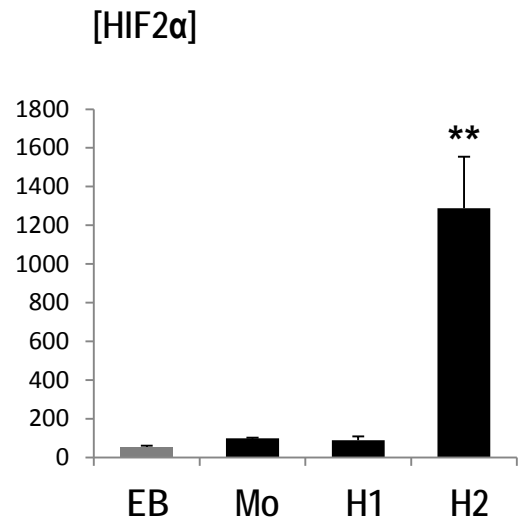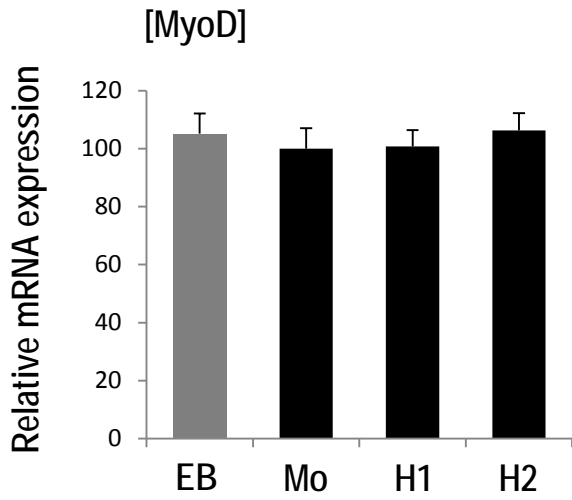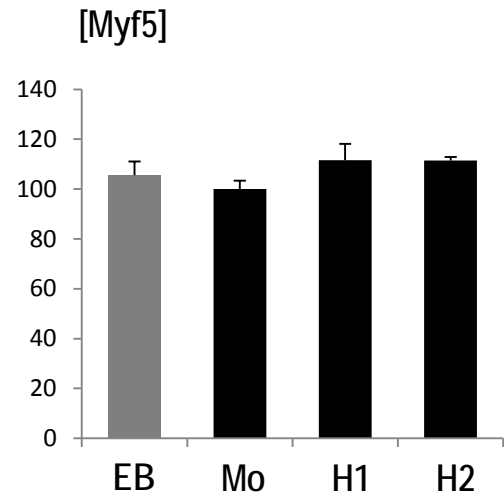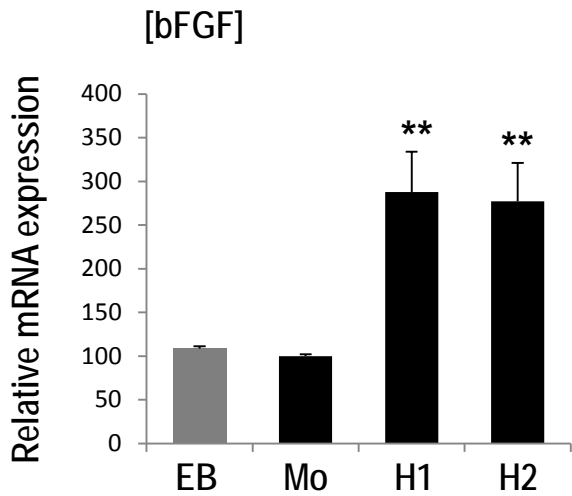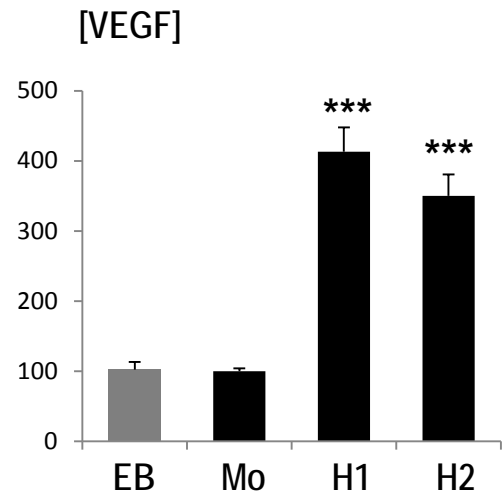

# Supplementary Figure S2

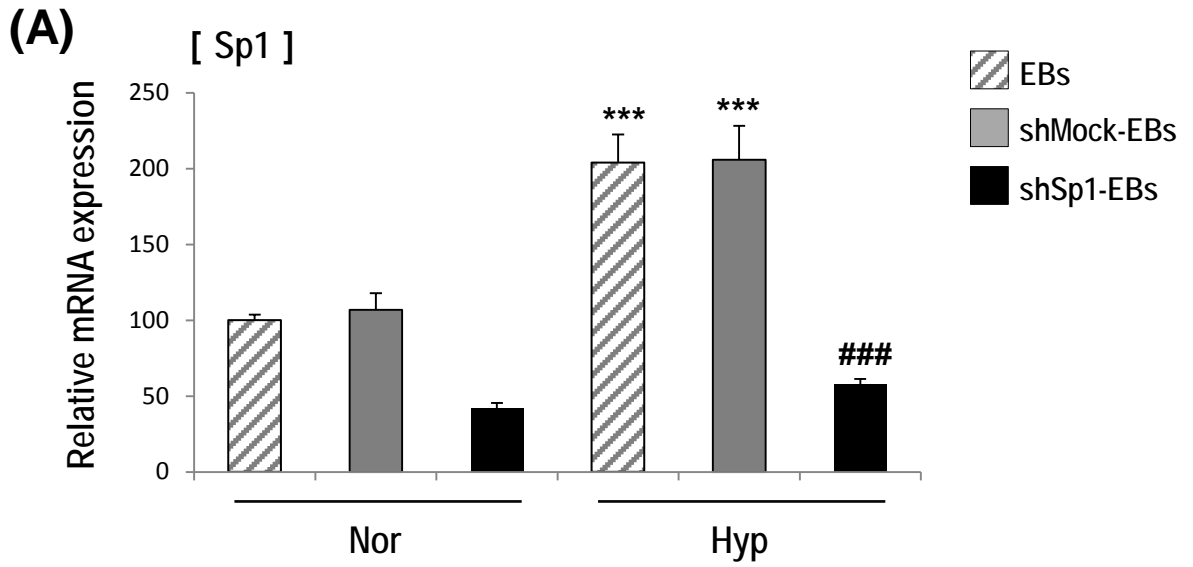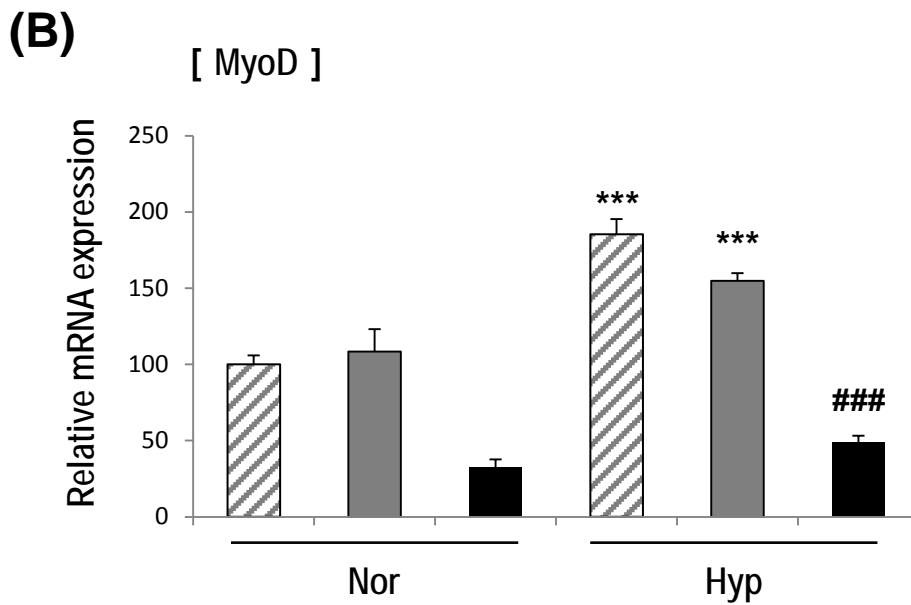

# Supplementary Figure S3

## (A) Sp1 mRNA

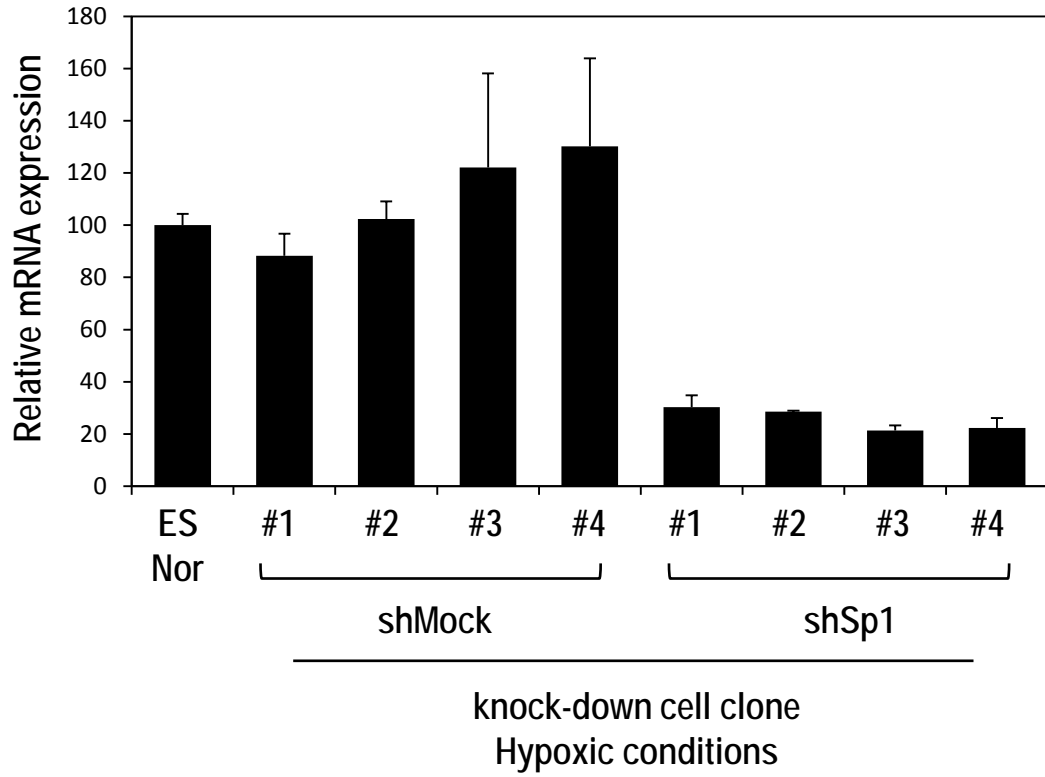



# Supplementary Figure S4

## (A) Sp1 protein

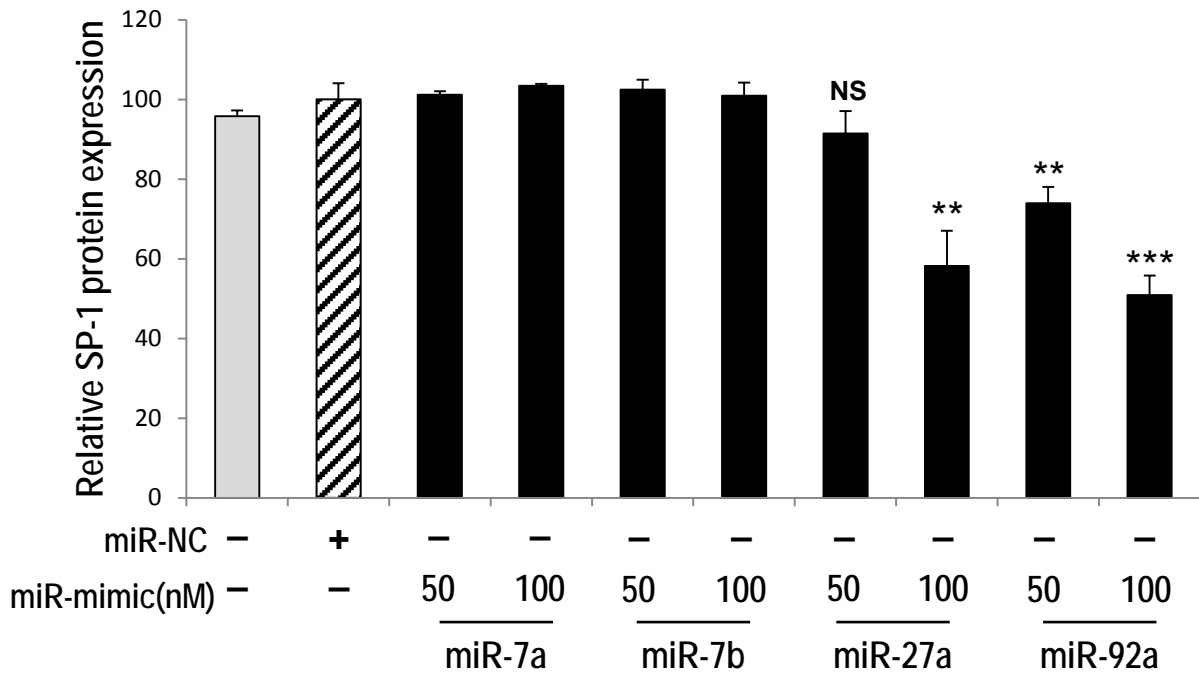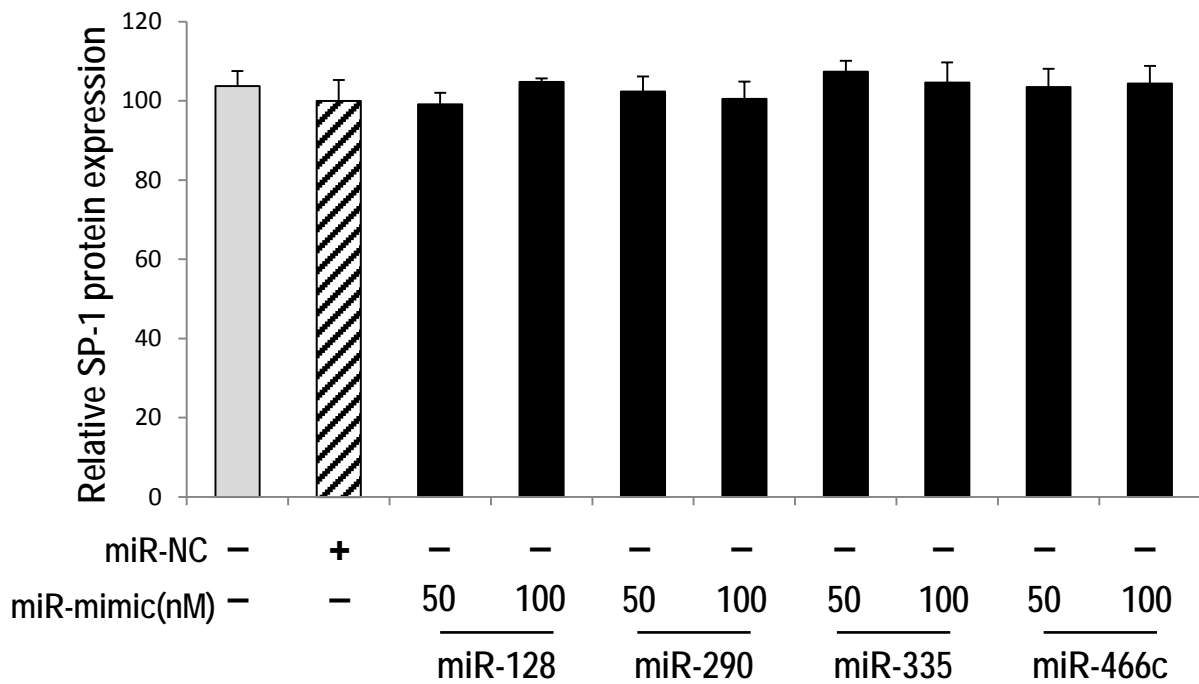

Supplement: mmc1.pdf [file mmc1.pdf]
