# Supplementary material
Source: PubMed Central journal article supplement (PMC6951826)

# The MicroRNA-92a/Sp1/MyoD Axis Regulates Hypoxic Stimulation of Myogenic Lineage Differentiation in Mouse Embryonic Stem Cells

Seo-Yeon Lee,<sup>1,2,5</sup> Jimin Yang,<sup>1,5</sup> Jung Hwa Park,<sup>2</sup> Hwa Kyoung Shin,<sup>2</sup> Woo Jean Kim,<sup>3</sup> Su-Yeon Kim,<sup>1</sup> Eun Ju Lee,<sup>1</sup> Injoo Hwang,<sup>1</sup> Choon-Soo Lee,<sup>1</sup> Jaewon Lee,<sup>1</sup> and Hyo-Soo Kim<sup>1,4</sup>

<sup>1</sup>Biomedical Research Institute, Seoul National University Hospital, Seoul, Republic of Korea; <sup>2</sup>Korean Medical Science Research Center for Healthy-Aging, Graduate Training Program of Korean Medicine for Healthy-Aging, Pusan National University, Yangsan, Republic of Korea; <sup>3</sup>Department of Anatomy, College of Medicine, Kosin University, Busan 49267, Republic of Korea; <sup>4</sup>Department of Internal Medicine, Seoul National University College of Medicine, Molecular Medicine & Biopharmaceutical Sciences, Seoul National University, Seoul, Republic of Korea

**Hypoxic microenvironments exist in developing embryonic tissues and determine stem cell fate. We previously demonstrated that hypoxic priming plays roles in lineage commitment of embryonic stem cells. In the present study, we found that hypoxia-primed embryoid bodies (Hyp-EBs) efficiently differentiate into the myogenic lineage, resulting in the induction of the myogenic marker MyoD, which was not mediated by hypoxia-inducible factor 1 $\alpha$  (HIF1 $\alpha$ ) or HIF2 $\alpha$ , but rather by Sp1 induction and binding to the *MyoD* promoter. Knockdown of Sp1 in Hyp-EBs abrogated hypoxia-induced MyoD expression and myogenic differentiation. Importantly, in the cardiotoxin-muscle injury mice model, Hyp-EB transplantation facilitated muscle regeneration *in vivo*, whereas transplantation of Sp1-knockdown Hyp-EBs failed to do. Moreover, we compared microRNA (miRNA) expression profiles between EBs under normoxia versus hypoxia and found that hypoxia-mediated Sp1 induction was mediated by the suppression of miRNA-92a, which directly targeted the 3' untranslated region (3' UTR) of *Sp1*. Further, the inhibitory effect of miRNA-92a on Sp1 in luciferase assay was abolished by a point mutation in specific sequence in the *Sp1* 3' UTR that is required for the binding of miRNA-92a. Collectively, these results suggest that hypoxic priming enhances EB commitment to the myogenic lineage through miR-92a/Sp1/MyoD regulatory axis, suggesting a new pathway that promotes myogenic-lineage differentiation.**

## INTRODUCTION

Embryonic stem cells (ESCs) possess the capacity for unlimited cell growth and the ability to self-renew and differentiate into all types of mature cells.<sup>1</sup> Understanding the regulatory mechanisms underlying the differentiation of ESCs into specific cell types might be useful in manipulating stem cell fate for cell therapy. In cancer biology, hypoxia affects various pathophysiologic processes including cell survival, cell apoptosis, DNA repair, vascular development, and angiogenesis during tumor formation.<sup>2-5</sup> Also in stem cell biology, hypoxia is important because low oxygen gradients exist widely in developing embryonic tissues because of limited oxygen diffusion due to in-

creases in embryo size and dense organ structure formation.<sup>6</sup> Hypoxic microenvironments can determine stem cell fate by modulating processes such as proliferation, differentiation, and maintenance.<sup>7</sup> We previously reported that hypoxia stimulates ESC differentiation into the vascular lineage via hypoxia-inducible factor 1 (HIF1), and that HDAC6 downregulation by hypoxia potentiates the myogenic differentiation of ESCs.<sup>8,9</sup> Thus, we have been interested in the mechanisms of how the unique microenvironment such as hypoxia regulates stem cell differentiation.

Sp1 belongs to a family of zinc-finger transcription factors involved in cell-cycle regulation, hormonal activation, apoptosis, and angiogenesis.<sup>10,11</sup> It also regulates the expression of genes involved in differentiation and embryonic development.<sup>12,13</sup> This protein is abundant in most cells, but its expression changes during development and varies in different cell types.<sup>14</sup> Sp1 binds GC-rich sequences in promoters and, specifically, it recognizes the consensus sequence 5'-GCCCC GCCCTC-3' or other related GC-rich sequences.<sup>15</sup> Interestingly, Sp1-deficient mouse (Sp1<sup>-/-</sup>) embryos survive until day 9.5 (E9.5) of gestation but display severely retarded growth with phenotypic abnormalities, and these animals die at approximately E11. This suggests that Sp1 is essential for normal early embryonic development and plays an important role in maintaining differentiated cells.<sup>12</sup>

Recent advances in small RNA research have suggested that microRNAs (miRNAs) are important regulators of development and differentiation in stem cells.<sup>16</sup> miRNAs comprise a large family of noncoding small RNAs of approximately 22 nucleotides (nt) in length that act as negative regulators of gene expression.<sup>17,18</sup> Mature

Received 22 February 2019; accepted 14 August 2019;  
<https://doi.org/10.1016/j.ymthe.2019.08.014>.

<sup>5</sup>These authors contributed equally to this work.

**Correspondence:** Hyo-Soo Kim, MD, PhD, Department of Internal Medicine, Seoul National University College of Medicine, Molecular Medicine & Biopharmaceutical Sciences, Seoul National University, Seoul, Republic of Korea.

**E-mail:** [hyosoo@snu.ac.kr](mailto:hyosoo@snu.ac.kr)

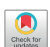

miRNAs recognize their target mRNAs to modulate translational efficiency and/or mRNA degradation by binding complementary sequences within the 3' untranslated region (3' UTR).<sup>17,18</sup> Further, many miRNA sequences are often highly conserved in *Drosophila*, mice, and humans. Moreover, the expression of miRNAs is regulated in tissue-specific and developmental-stage-specific manners<sup>19–21</sup> and one miRNA can target many mRNAs that are involved in various cellular functions such as organ development, differentiation, cancer, and metabolism.<sup>16,22–24</sup>

Muscle loss is the fundamental phenomenon that increases the risk of death in muscle-wasting disorders, chronic disease, or aging.<sup>25</sup> Accordingly, ESCs might serve as a good source of muscle cells to treat these conditions;<sup>26</sup> therefore, methods to invoke specific myogenic differentiation have been investigated, but these approaches are not yet sufficient. Four myogenic regulatory factors (MRFs), namely MyoD, Myf-5, myogenin, and MRF4, control the specification and the differentiation of the muscle lineage.<sup>27</sup> MyoD was the first identified MRF that can convert fibroblasts to skeletal myoblasts.<sup>28</sup> The genetically engineered ESCs expressing MyoD efficiently differentiate into the muscle lineage.<sup>26</sup>

We previously reported that hypoxic exposure during first few days of differentiation efficiently stimulates the ESC differentiation to the meso-endoderm.<sup>8</sup> Therefore, we here investigated whether hypoxic priming could enhance the differentiation of ESCs toward the myogenic differentiation among mesoderm lineage, compared to that under normoxic conditions. Indeed, the effects of hypoxia on muscle-lineage differentiation and the underlying mechanisms have not been fully investigated. We also examined the muscle-regenerative ability of hypoxia-primed embryoid bodies (EBs) in a mouse muscle injury model. Particularly, with regard to the mechanism underlying differentiation, we investigated hypoxia-regulated miRNA and the transcription factor Sp1 in addition to the regulatory effect of Sp1 on MyoD expression. Our findings enhance the knowledge of myogenic differentiation and might provide useful insights into the mechanisms of stem cell differentiation.

## RESULTS

### Hypoxia Induces the Differentiation of Mouse Embryonic Stem Cell (mESC)-Derived EBs to a Myogenic Lineage

We previously reported that hypoxia stimulates stem cell differentiation toward meso-endoderm lineages and especially vascular lineage.<sup>8</sup> Because we were also interested in ESC commitment to the myogenic lineage among the mesoderm lineages, we analyzed the expression of myogenic markers (Figure 1). EBs were formed for 3 days, exposed to normoxic (21% oxygen) or hypoxic (1% oxygen) conditions for 16 h, and further cultured under spontaneous differentiation conditions (DMEM/10% FBS) for up to 10 days (Figure 1A). mRNA expression of the pluripotency marker *Oct4* was remarkably downregulated upon differentiation and its expression was significantly lower at every time point in response to hypoxic conditions as compared to that under normoxic conditions (Figure 1B). Moreover, myogenic marker genes (*MyoD*, *Myf5*) were markedly upregulated in normoxic cells upon dif-

ferentiation. Interestingly, only the expression of *MyoD*, a master regulator of myogenesis,<sup>29</sup> was significantly increased in hypoxic cells than in normoxic cells (Figure 1B). We next performed immunofluorescence staining for MyoD and myosin heavy chain (MyHC) to confirm the myogenic differentiation potential (Figure 1C). MyoD and MyHC were rarely detectable in normoxic-EBs (Nor-EB), whereas strong staining was observed in hypoxia-primed EBs (Hyp-EB) (Figure 1C), indicating that hypoxia efficiently induces differentiation into the myogenic lineage.

### Hypoxia-Stimulated MyoD Upregulation Is Mediated by Sp1 and Not HIF1 or HIF2

Differentiation into the myogenic lineage was efficiently enhanced by hypoxia; thus, we attempted to determine the mechanism through which this occurs. We focused on MyoD, a master regulator of myogenesis,<sup>29</sup> and HIF, a key regulator of hypoxic responses. As shown in Figure 2A, both MyoD and HIF1 $\alpha$  proteins were significantly induced in response to hypoxia, whereas Myf5 protein was not changed. To evaluate the effect of HIF1 $\alpha$  or HIF2 $\alpha$  on MyoD expression, we transfected cells with a HIF1 $\alpha$  or HIF2 $\alpha$  expression vector under normoxic conditions.<sup>8</sup> We expected that MyoD expression would be affected by either HIF1 $\alpha$  or HIF2 $\alpha$ ; however, both protein and mRNA levels were unaffected (Figures 2B and 2C; Figure S1). Moreover, the expression of hypoxia-regulated genes was increased in HIF1 $\alpha$ - and HIF2 $\alpha$ -over-expressing cells (Figure S1), indicating that the expression plasmids functioned properly.

To identify factors that increase MyoD expression in response to hypoxia, we investigated the *MyoD* promoter region and found candidate regulators such as Sp1 and AP2 $\alpha$  (Figure 3A).<sup>30,31</sup> One putative AP2 $\alpha$ -binding site and two putative Sp1-binding sites were identified. Sp1 mRNA and protein were upregulated in Hyp-EBs compared to Nor-EBs; however, AP2 $\alpha$  mRNA and protein were unaffected (Figures 3B and 3C). We then confirmed the hypoxia-mediated upregulation of Sp1 by immunofluorescence staining, as this protein was strongly detected in EBs grown in hypoxic conditions (Figure 3D). To determine the effect of Sp1 on MyoD expression, we first performed Sp1 knockdown using specific short hairpin RNA (shRNA). Sp1 protein and mRNA were markedly increased under hypoxic conditions, but were significantly decreased after transfection with shSp1 even under hypoxia (Figures 3E and 3F; Figure S2). Interestingly, hypoxia-stimulated MyoD protein and mRNA expression was significantly downregulated in shSp1-EBs (Figures 3E and 3F; Figure S2). These results suggest that MyoD expression depends on Sp1 in response to hypoxic stimuli (Figure 3G).

### Sp1 Increases MyoD Transcription and Activates MyoD Promoter Activity

Because Sp1 knockdown was found to inhibit hypoxia-mediated MyoD upregulation, we tested the ability of Sp1 to stimulate *MyoD* promoter activity. We first performed chromatin immunoprecipitation (ChIP) assays to examine the binding of Sp1 to the *MyoD* promoter containing putative Sp1-binding sites (Figure 4A). ChIP analysis shows that Sp1 binding to the *MyoD* promoter region was

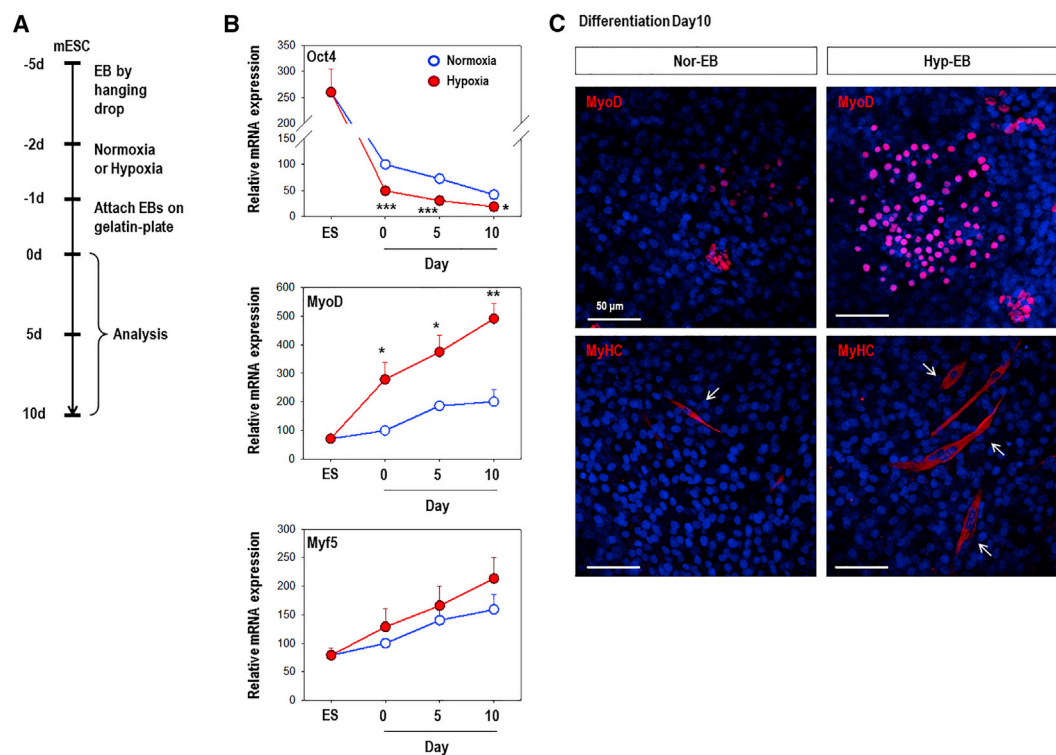

**Figure 1. Hypoxic Preconditioning Stimulates the Differentiation of mESC-Derived EBs to the Myogenic Lineage**

(A) EBs were formed from C57 mESCs by the hanging drop method for 3 days, cultured under normoxic or hypoxic conditions for 16 h, and allowed to attach to a 0.3% gelatin-coated plate in DMEM/10% FBS for 1 day; the medium was then changed to fresh media and cells were further differentiated for up to 10 days. (B) The pluripotency marker *Oct4* was significantly downregulated compared to expression under conditions of normoxia, and the myogenic marker *MyoD* was significantly upregulated in hypoxic cells compared to expression in normoxic cells based on real-time PCR analysis. Graphs show the relative percent change (n = 4); \*p < 0.05, \*\*p < 0.01, \*\*\*p < 0.001 versus the normoxic group. (C) Immunofluorescence staining for MyoD (red) and MyHC (red, arrows) 10 days after EB reattachment. Nor-EB, normoxic-EBs; Hyp-EB, hypoxia-primed EBs. Nuclear DNA was counterstained with DAPI (blue). Representative confocal microscopic photographs are shown. Magnification, 200 $\times$ ; scale bars, 50  $\mu$ m.

increased by hypoxia compared to that under normoxia (Figure 4A). In addition, we examined the effect of hypoxia on the *MyoD* promoter by performing promoter luciferase assays (data not shown). Reporter gene activity was significantly increased in response to hypoxia in cells transfected with the *MyoD*-promoter Luc (*MyoD*-Luc). Next, we further performed promoter luciferase assays to determine the effects of Sp1 overexpression on the *MyoD* promoter and to identify Sp1-binding sites among two putative regions. C57 ESCs were transfected with Sp1 overexpression vector, and we confirmed that *MyoD* expression was transcriptionally increased by Sp1 overexpression (Figures 4B and 4C). Figure 4D shows these two sites (red characters, numbered as 1 and 2; 5'-GCTCCGCCCTA-3' and 5'-CCCCGCCCC-3', respectively) and the 6-bp core sequence (5'-CCGCC-3') for Sp1 binding are bolded.<sup>31</sup>

After Sp1 overexpression, luciferase activity was significantly increased in cells transfected with the wild-type (WT)-*MyoD* promoter region (Figure 4E). Interestingly, cells transfected with the  $\Delta$ 1-mt plasmid, in which the first Sp1-binding site (Sp1-site1) was deleted, showed similar or slightly reduced luciferase activity to that elicited by the WT-*MyoD* promoter. In contrast, the induction of

*MyoD* reporter activity by Sp1 was significantly inhibited in cells transfected with the  $\Delta$ 2-mt plasmid in which the second Sp1-binding site (Sp1-site2) was deleted. In addition, cells transfected with the  $\Delta$ 1, 2-mt plasmid (both Sp1-binding sites deleted) showed the lowest *MyoD* reporter activity. From these results, we suggest that induction of *MyoD* promoter activity by Sp1 depends largely on the Sp1 binding site 2 (5'-CCCCGCCCC-3') but weakly on the binding site 1 (Figure 4E).

#### Sp1-Mediated MyoD Expression Is Important for Hypoxic EB Differentiation into the Myogenic Lineage

To confirm the role of Sp1 in regulating myogenic-lineage differentiation, we specifically knocked down its expression (Figure 5). Sp1 protein and mRNA levels were markedly reduced after the transfection of shSp1 (Figure 5A; Figure S3). We then confirmed *MyoD* expression in various shMock- or shSp1-knockdown clones to preclude interclone variation, and *MyoD* protein was found to be remarkably decreased in all four Sp1 knockdown ES clones grown under hypoxic conditions (Figure 5A). We then further analyzed the specific myogenic differentiation potential of shSp1-EBs in response to hypoxia, compared to that in shMock-EBs under the same

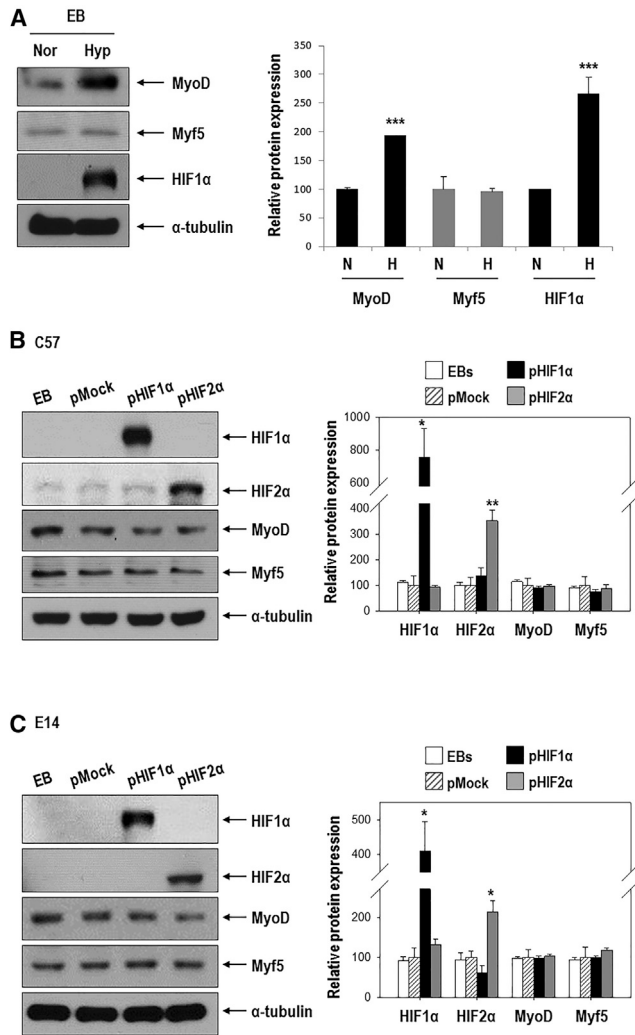

**Figure 2. MyoD Is Upregulated under Hypoxia, but Its Expression Is Not Stimulated by Either HIF1 $\alpha$  or HIF2 $\alpha$**

(A) EBs formed for 3 days were cultured under normoxic or hypoxic conditions for 16 h. Western blotting of MyoD, Myf5, and HIF1 $\alpha$  (left) was then performed. Quantification of results (right,  $n = 3$ ; \*\*\* $p < 0.001$  versus the normoxic group). (B and C) Effect of HIF1 $\alpha$  or HIF2 $\alpha$  overexpression on MyoD and Myf5 in C57 ESCs (B) and E14 ESCs (C). ESCs were transfected with 1  $\mu$ g pEGFP-HIF1 $\alpha$  or pEGFP-HIF2 $\alpha$  for 24 h and allowed to form EBs for 3 days under normoxic conditions. Western blotting for HIF1 $\alpha$ , HIF2 $\alpha$ , MyoD, and Myf5 (left) and quantification (right,  $n = 3$ –4; \* $p < 0.05$ , \*\* $p < 0.01$  versus pMock).

conditions (Figures 5B–5E). The cells were cultured in skeletal muscle induced media (SkIM) for specific muscle differentiation.<sup>32,33</sup> As shown in Figure 5C, the myogenic regulatory factors MyoD and myogenin were remarkably upregulated during the differentiation of Hyp-shMock-EBs compared to control Nor-shMock-EBs (Figure 5C). In contrast, Sp1 knockdown EBs (shSp1) showed impaired myogenic-lineage differentiation even in response to hypoxia (Figure 5C). We next performed immunofluorescence staining for MyoD and MyHC to confirm the involvement of Sp1 in hypoxia-driven mus-

cle-lineage differentiation (Figures 5D and 5E). Strong staining for both markers was observed in Hyp-shMock EBs compared to Nor-shMock EBs. In contrast, MyoD and MyHC were rarely detected in Hyp-shSp1 EBs, indicating that Sp1 is an important regulator of myogenic differentiation in response to hypoxia.

### Sp1 Knockdown Abrogates Skeletal Muscle Regeneration Induced by Hypoxia-Primed EBs *In Vivo*

Hyp-EBs showed efficient myogenic-lineage commitment *in vitro*, and Sp1 was found to mediate hypoxia-primed EB differentiation into the myogenic lineage. We then tested whether hypoxia-primed EBs could undergo myogenic differentiation *in vivo*, thereby leading to enhanced muscle regeneration, using a mouse model of cardiotoxin (CTX)-induced muscle injury (Figure 6). To monitor the time course of muscle regeneration, we performed rota-rod analysis after CTX muscle injury. We injured the tibialis anterior (TA) muscles of both legs by injecting CTX and then 1 day later transplanted EBs from the three groups including shMock-EBs under normoxia (Nor-shMock EBs), shMock-EBs with hypoxic priming (Hyp-shMock EBs), and hypoxia-primed EBs with Sp1 knockdown (Hyp-shSp1 EBs). We monitored locomotive recovery every week for up to 8 weeks by recording the time until animals fell off the rotating rod (Figures 6A–6C). Consistent with our *in vitro* results, mice transplanted with Hyp-shMock cells (CTX+Hyp-shMock) showed significantly better motor function than those treated with Nor-shMock cells (CTX+Nor-shMock) from 2 weeks after injury, and this therapeutic effect continued until 8 weeks (Figures 6B and 6C). Interestingly, transplantation of Sp1-knockdown hypoxia-treated EBs (CTX+Hyp-shSp1) resulted in weaker motor function compared to that in animals treated with Hyp-shMock cells (CTX+Hyp-shMock).

We then observed the regenerating myofibers with centrally located nuclei that originated from transplanted EBs marked by DiI labeling (red, arrows; Figure 6D). We also performed laminin immunofluorescence (green) because skeletal muscle fibers are surrounded by the basal lamina and its major components are laminin.<sup>34</sup> Regenerating myofibers, based on DiI fluorescence, were more frequently found in the Hyp-shMock group than the Nor-shMock group. In contrast, myofibers showing DiI fluorescence were significantly decreased in the Hyp-shSp1 group (Figures 6D and 6E). The cross-sectional areas of regenerated myofibers were then examined and muscle fibers in the Hyp-shMock group were significantly bigger than those in the Nor-shMock group. In contrast, the cross-sectional areas of muscles transplanted with Hyp-shSp1 cells were much smaller than those in the Hyp-shMock group (Figure 6F). These results support the successful engraftment, differentiation into the myogenic lineage, and improved rota-rod performance of the Hyp-shMock group, which was diminished by Sp1 suppression.

### Sp1 Is Upregulated by Hypoxia-Mediated miRNA-92a Suppression

As stated, Sp1 was found to be increased by hypoxia (Figure 3), and thus, we investigated the upstream regulators for Sp1, focusing on miRNAs that typically suppress target gene expression.<sup>17</sup> We

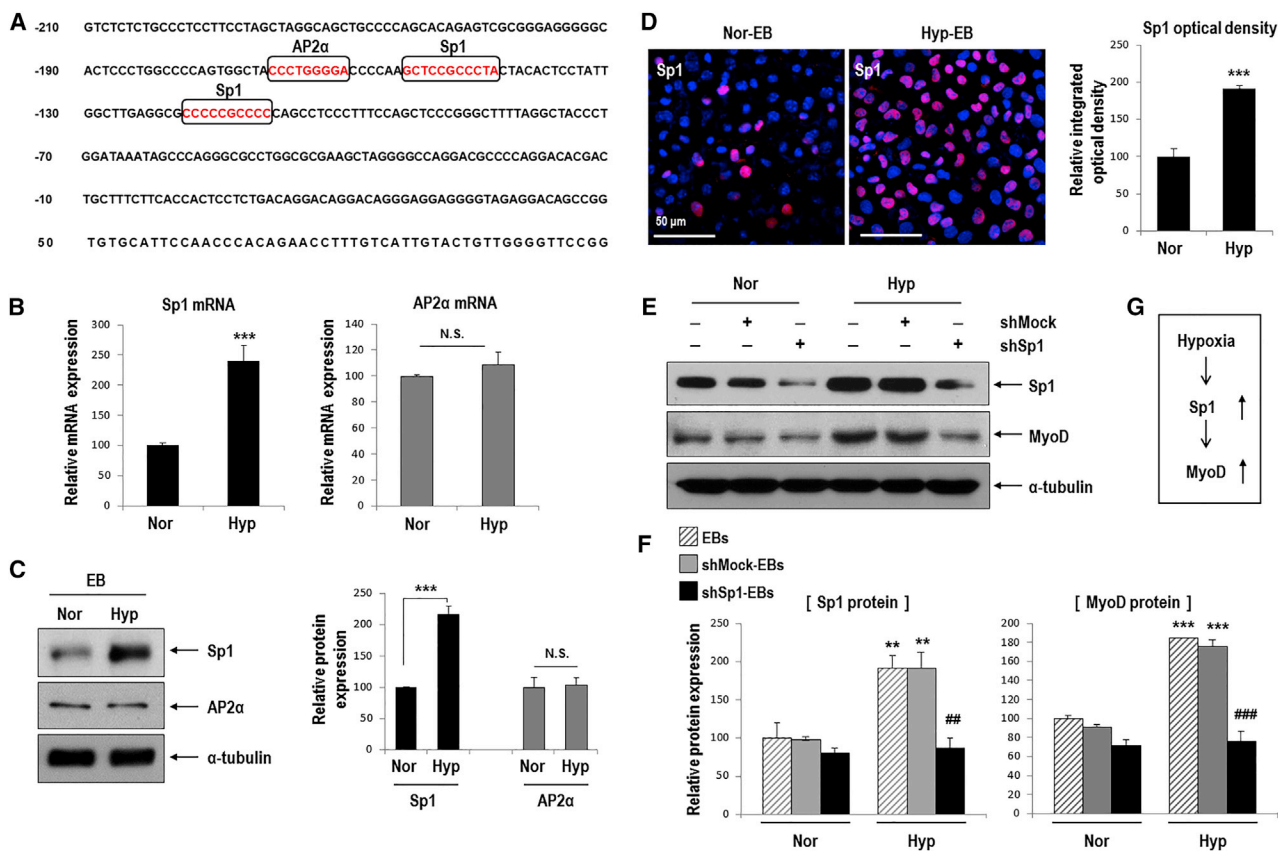

**Figure 3. MyoD upregulation by hypoxia occurs via Sp1 stimulation in hypoxic EBs**

(A) The mouse *MyoD* putative promoter region was found to contain candidate Sp1- and AP2 $\alpha$ -binding sites (marked by squares). Nucleotides are numbered relative to the translation start site of MyoD. (B and C) Sp1, but not AP2 $\alpha$ , was remarkably increased in hypoxic EBs compared to normoxic EBs (B) Real-time PCR for Sp1 and AP2 $\alpha$  mRNA ( $n = 5$ , \*\*\* $p < 0.001$ ). (C) Western blot for Sp1 and AP2 $\alpha$  (left). Quantification of western blotting results (right;  $n = 3$ , \*\*\* $p < 0.001$ ). (D) Immunofluorescence staining of Hyp-EBs and Nor-EBs for Sp1 (red) and nuclei (blue) on day 3 after attachment (left). Magnification, 400 $\times$ ; scale bars, 50  $\mu$ m. Quantitative data for the intensity of Sp1 fluorescence. At least three randomly selected fields were analyzed from three independent experiments (\*\* $p < 0.01$ ). (E) Transient transfection of shSp1. ESCs were transfected with 1  $\mu$ g shMock or shSp1 for 24 h, allowed to form EBs for 3 days under normoxia, and further incubated for 16 h under normoxic or hypoxic conditions. Sp1 protein was markedly reduced after transient transfection of shSp1 compared to that in the non-target shRNA control (shMock). Sp1 knockdown suppressed the increased expression of MyoD protein even under conditions of hypoxia. (F) Quantification of western blotting results for Sp1 and MyoD proteins ( $n = 3$ ); \*\* $p < 0.01$ , \*\*\* $p < 0.001$  versus Nor-EBs. ## $p < 0.01$ , ### $p < 0.001$  versus Hyp-shMock-EBs. (G) Sp1 was stimulated by hypoxia and then increased MyoD expression.

hypothesized the existence of Sp1-suppressive miRNA(s) that would be reduced by hypoxia. To find miRNAs that are downregulated upon differentiation and further downregulated by hypoxia, we analyzed miRNA expression profiles using miRNA microarray comparing the three groups (normoxic ESCs, normoxic EBs, and hypoxic EBs; Figure 7). Among the 388 miRNAs that were significantly changed between normoxic ESCs, normoxic EBs, and hypoxic EBs, 18 were sequentially downregulated in the following order: normoxic ESCs > normoxic EBs > hypoxic EBs. To identify miRNAs that target the 3' UTR of *Sp1* (Sp1 3' UTR), we used the web-based target prediction tools TargetScan, [microRNA.org](http://microRNA.org), and miRBase. We selected eight candidate miRNAs that were common among the three tools, namely miR-7a, miR-7b, miR-27a, miR-92a, miR-128, miR-290, miR-335, and miR-466c (Figure 7A). We next confirmed that the expression of these candidate miRNAs was significantly decreased

in normoxic EBs compared to that in normoxic ESCs and were further suppressed in hypoxic EBs (Figure 7B). We then tested which of these eight miRNAs regulate Sp1 expression (Figures 7C and 7D). After transfection with each mimic oligomer, only miR-27a and miR-92a remarkably suppressed Sp1 expression, whereas the overexpression of other mimics did not affect levels of Sp1 (Figures 7C and 7D; Figure S4).

Next, we further determined whether forced expression of miR-27a and miR-92a pre-miR miRNA precursors could control Sp1 levels. Both pre-miR27a and pre-miR92a downregulated Sp1 protein, which was consistent with the results of mimic transfections (Figure 8A). Interestingly, a miR-92a precursor (pre-miR-92a) significantly suppressed *Sp1* mRNA expression, whereas a miR-27a precursor (pre-miR-27a) had no effect (Figure 8B). From these results, we inferred

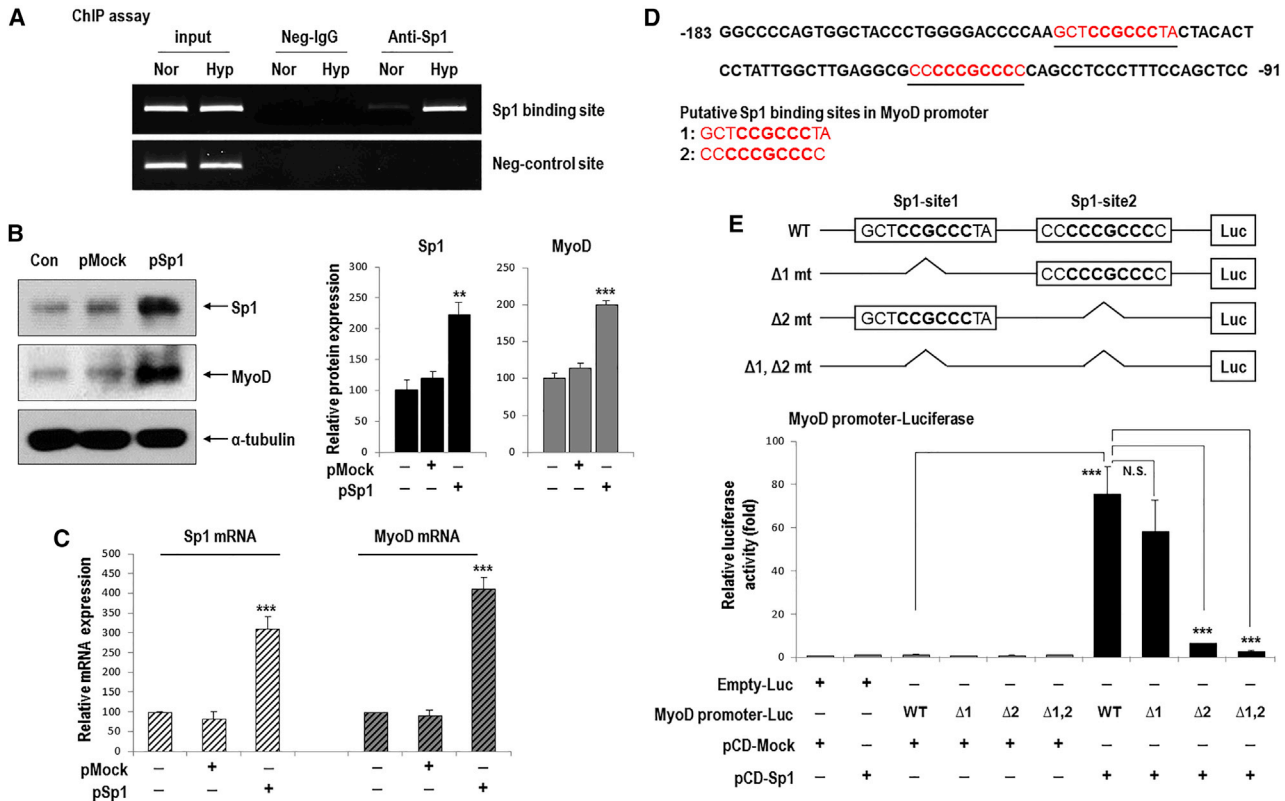

**Figure 4. Sp1 Increased MyoD Expression through Transcriptional Activation of the MyoD Promoter**

(A) ChIP analysis shows the Sp1 binding to the MyoD promoter region. Lysates of differentiating C57-ESCs exposed to hypoxia for 8 h were immunoprecipitated with an antibody against Sp1. The precipitated DNA was evaluated by PCR using specific primers for Sp1-binding sites in the MyoD promoter (n = 3) and a representative image is shown. (B and C) MyoD expression in response to Sp1 overexpression. ESCs were transfected with 1 μg pMock or pSp1 for 24 h and allowed to form EBs for 3 days under normoxic conditions. (B) Western blot for MyoD, which was increased by Sp1 overexpression (left). Quantification of western blotting results (right; n = 3, \*\*p < 0.01, \*\*\*p < 0.001). (C) Real-time PCR analysis showed that MyoD expression was transcriptionally increased by Sp1 overexpression (n = 4; \*\*\*p < 0.001). (D) Segments of the MyoD upstream transcriptional regulatory region containing two putative Sp1-binding sites (red and underlined) located between -91 and -183 bp. (E) Schematic diagram of two Sp1-binding motifs in the full sequence of the MyoD promoter and the promoter deletion mutants (top). Differentiating C57 ESCs cultured in the absence of LIF and feeder cells were co-transfected with various combinations of the 1 μg full-length MyoD promoter, 1 μg MyoD promoter deletion mutants, 0.2 μg pCMV-β-gal, 1 μg pCD-Mock, and 1 μg pCD-Sp1 plasmid for 24 h (bottom, n = 6, \*\*\*p < 0.001).

that miR-27a regulates Sp1 at the protein level, whereas miR-92a regulates Sp1 at the mRNA level. We further examined whether miR-27a or miR-92a could directly target the 3' UTR of Sp1 by performing luciferase reporter assays (Figures 8C and 8D). The Sp1 3' UTR is greater than 5 kb, and therefore it was broken up into shorter fragments and cloned into two constructs with overlapping sequence. Fragment A contained two miR-27a-binding sites and one miR-92-binding site, whereas fragment B contained one miR-27a-binding site and two miR-92-binding sites (Figure 8C). After overexpression of pre-miR-27a or pre-miR-92a, only pre-miR-92a significantly suppressed luciferase activity from fragment B of the 3' UTR of Sp1; however, pre-miR-27a did not affect luciferase with this construct. Luciferase activity from fragment A of the 3' UTR of Sp1 was not affected by either pre-miR-27a or pre-miR-92a (Figure 8D).

Within the 3' UTR-fragment B-Luc construct, there were two miR-92a-binding sites including region 1 (transcript position

3,737–3,765) and region 2 (transcript position 4,983–5,011) (Figure 8E). Thus, we investigated whether miR-92a could target either of the two putative target sites within WT or mutated (mt) fragment B sequences of the 3' UTR of Sp1. Overexpression of pre-miR-92a significantly suppressed luciferase activity from the WT and region 2 mutated versions of this sequence (Figure 8F). In contrast, pre-miR-92a did not affect luciferase activity when region 1 was mutated. Pre-miR negative control (NC pre-miR) also did not affect luciferase activity (Figure 8F). These results indicated that miR-92a directly targets region 1 (transcript position 3,737–3,765) within the 3' UTR of Sp1. In addition, miR-92a was inhibited under normoxia based on the transfection of an antagomiR against miR-92a, which reproduced the effects of miR-92a reduction under hypoxic conditions, and Sp1 expression was increased even under normoxic conditions (Figure 8G). All these results strongly suggested that Sp1 might be a direct target of miR-92a.

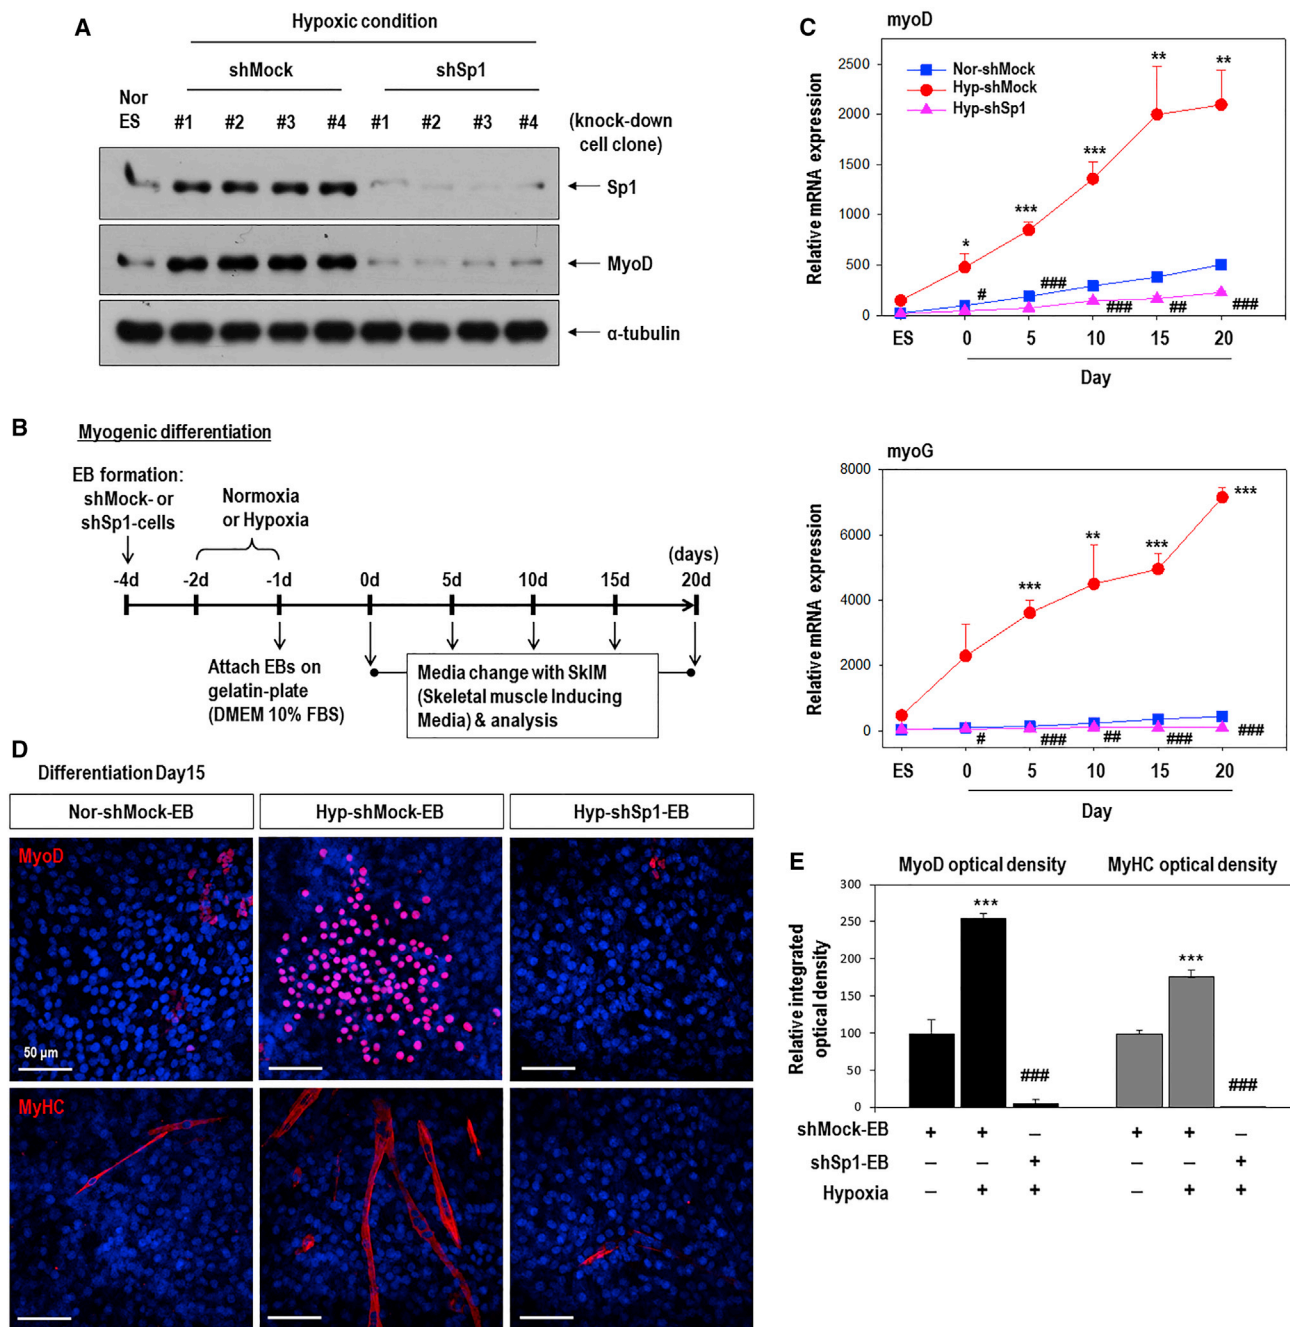

**Figure 5. Knockdown of Sp1 Decreases the Myogenic Differentiation of Hypoxic-EBs**

(A) Generation of Sp1-knockdown stable cells. C57 ESCs were transfected with 1  $\mu$ g shMock or shSp1 for 24 h, and further selected by puromycin treatment. MyoD protein was remarkably decreased in all four Sp1-knockdown hypoxic-ES clones compared to that in all four control clones transfected with shMock. (B) Stable knockdown cells were formed as EBs by the hanging drop method, cultured under normoxic or hypoxic conditions, and plated onto a gelatin-coated plate in DMEM/10% FBS for 1 day. The culture medium was replaced with SkIM and further incubated for up to 20 days. (C) Muscle regulatory factors (MyoD, myogenin) were increased in Hyp-shMock cells compared to those in Nor-shMock cells, and were significantly decreased to a greater extent in Hyp-shSp1 cells compared to expression in Hyp-shMock cells ( $n = 6$ ); \* $p < 0.05$ , \*\* $p < 0.01$ , \*\*\* $p < 0.001$  versus Nor-shMock-EBs and # $p < 0.05$ , ## $p < 0.01$ , ### $p < 0.001$  versus Hyp-shMock-EBs. (D) Immunofluorescence staining for MyoD (red) or MyHC (red) at day 15 after EB reattachment. Nuclear DNA was counterstained with DAPI (blue). Magnification, 200 $\times$ ; scale bars, 50  $\mu$ m. (E) Quantitation of the intensity of MyoD and MyHC immunofluorescence ( $n = 6$ ). \*\*\* $p < 0.001$  versus normoxic shMock-EBs; ### $p < 0.001$  versus hypoxic shMock-EBs.

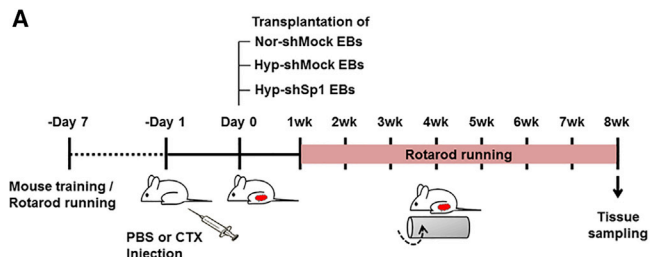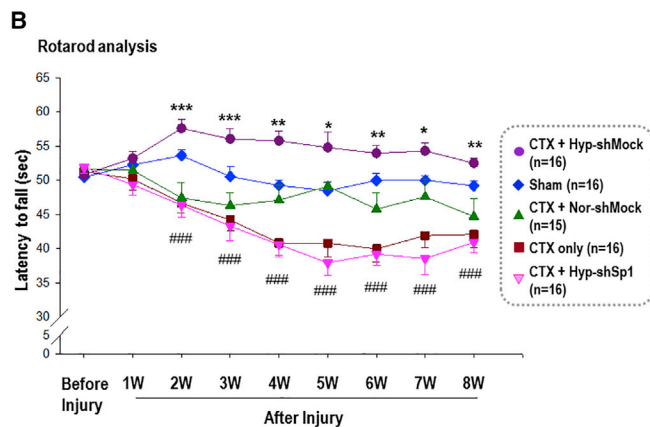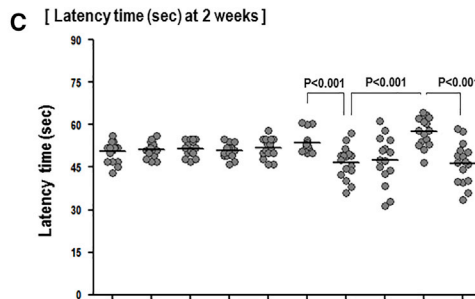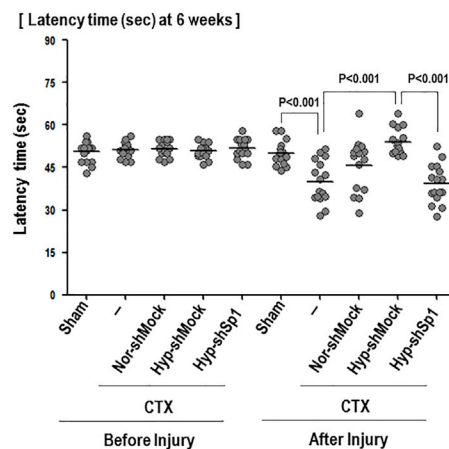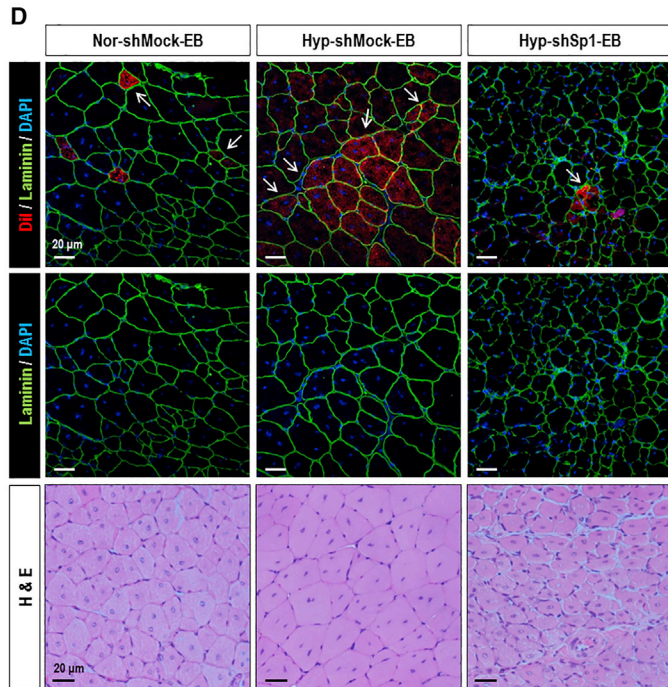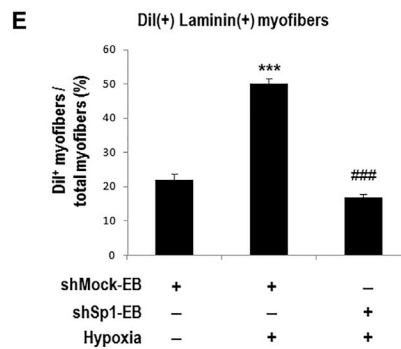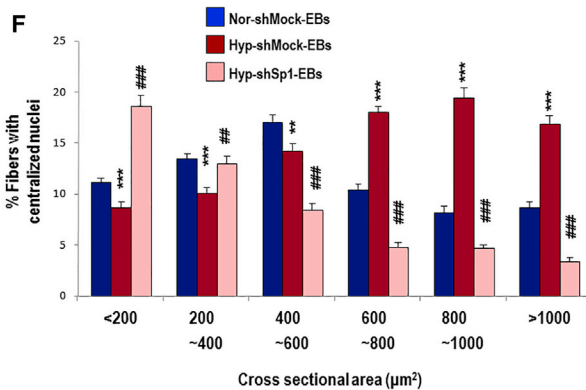

(legend on next page)



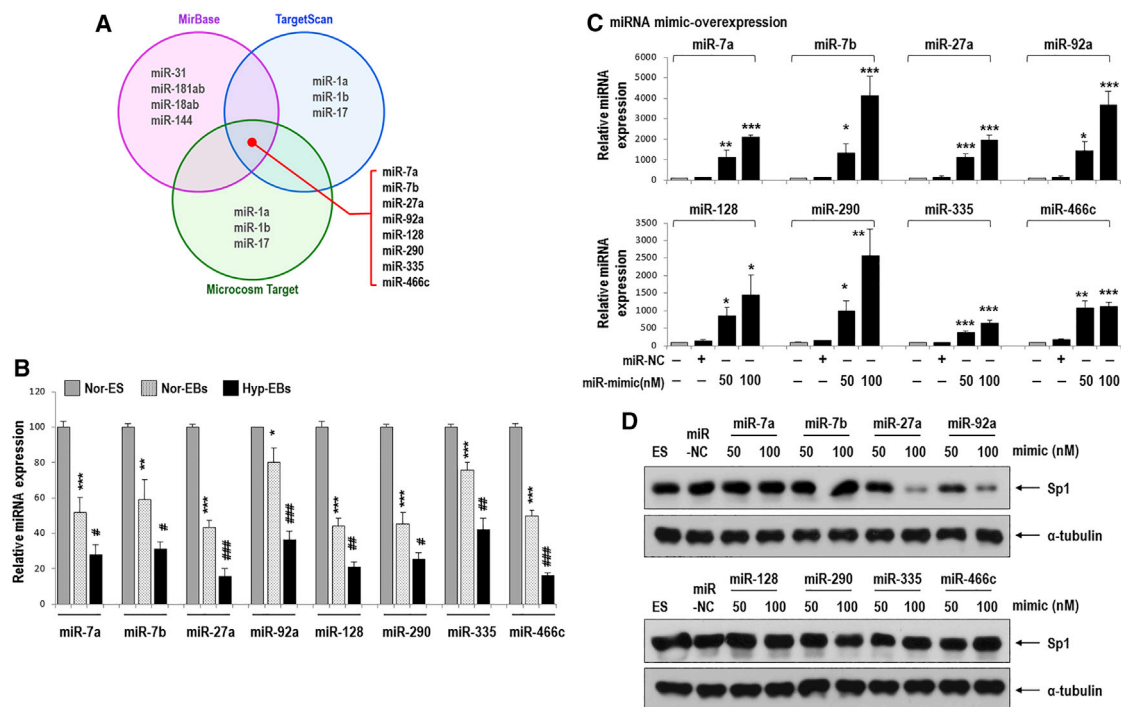

**Figure 7. Sp1 Suppression by Hypoxia-Responsive MiRNAs**

(A) A miRNA array was performed and among 18 miRNAs sequentially downregulated in the order of normoxic-ESCs (Nor-ES) > normoxic-EBs (Nor-EBs) > hypoxic-EBs (Hyp-EBs), and eight candidate miRNAs were selected based on the bioinformatics target prediction tools TargetScan, [microRNA.org](http://microRNA.org), and miRBase. (B) The expression of eight candidate miRNAs in Nor-ES, Nor-EBs, and Hyp-EBs was measured by real-time PCR ( $n = 5$ ; \* $p < 0.05$ , \*\* $p < 0.01$ , \*\*\* $p < 0.001$  versus Nor-ES and # $p < 0.05$ , ## $p < 0.01$ , ### $p < 0.001$  versus Nor-EBs). (C) Differentiating C57 ESCs were transfected with miRNA mimic-oligomer for 2 days under normoxic conditions, and miRNA expression was measured by real-time PCR. Each miRNA was overexpressed in a dose-dependent manner (miR-NC, miRNA-negative control;  $n = 5$ , \* $p < 0.05$ , \*\* $p < 0.01$ , \*\*\* $p < 0.001$ ). (D) Sp1 protein was reduced only by miR-27a and miR-92a mimics in C57 ESCs (miR-NC).

## DISCUSSION

The major finding of this study was that hypoxia stimulates myogenic-lineage differentiation and that the transcription factor Sp1 plays an important role in regulating MyoD expression during myogenic differentiation from mESCs under hypoxia. Furthermore, the promoter region of *MyoD* was found to contain a Sp1-binding site that confers responsiveness to hypoxia. Moreover, miR-92a, which declines in response to hypoxia, directly targets the 3' UTR of *Sp1* to suppress its expression, leading to hypoxia-mediated Sp1 in-

duction. In addition, knockdown of Sp1 abolished hypoxia-induced MyoD expression and myogenic marker expression in differentiating ESCs. Finally, knockdown of Sp1 in ESCs abolished muscle regeneration *in vivo*.

In our previous report,<sup>8</sup> hypoxia was found to induce the differentiation of ESCs toward a meso-endodermal and, further, a vascular lineage. Therefore, we hypothesized that hypoxia might play a role in myogenic-lineage differentiation because this lineage is derived

**Figure 6. Knockdown of Sp1 in Hypoxia-Primed EBs Diminishes Muscle Differentiation in an *In Vivo* Mouse Muscle Injury Model**

(A) Timetable of rota-rod analysis of mice with skeletal muscle injury. One day before cell transplantation, CTX was injected into the TA muscle (both legs) to induce muscle injury. We then monitored muscle power every week for 8 weeks in five groups: sham group with PBS injection (sham,  $n = 16$ ), injury only group with CTX injection (CTX only,  $n = 16$ ), injury and transplantation of normoxic shMock-EBs (CTX+Nor-shMock,  $n = 15$ ), injury and transplantation of hypoxic shMock-EBs (CTX+Hyp-shMock,  $n = 16$ ), and injury and transplantation of hypoxic shSp1-EBs (CTX+Hyp-shSp1,  $n = 16$ ). (B and C) The time required for mice to fall off the rotating rod was measured every week for 8 weeks (B) and at 2 weeks and 6 weeks after cell transplantation (C) as shown; \* $p < 0.05$ , \*\* $p < 0.01$ , \*\*\* $p < 0.001$  versus Nor-shMock-EBs and ### $p < 0.001$  versus Hyp-shMock-EBs. (D) Cross-section of TA muscle was stained with H&E or immunostained for laminin 2 $\alpha$  (green)/nuclei (blue) at 8 weeks after transplantation. Transplanted cells were pre-labeled with Dil (red). Most Dil fluorescence-positive red cells were regenerating myofibers with a central nucleus. Magnification, 200 $\times$ ; scale bars, 20  $\mu$ m. Myofibers positive for Dil in the Hyp-shSp1 group were smaller than those in the Hyp-shMock group. (E) Quantification of Dil(+)/Laminin(+) myofibers, which was high in the Hyp-shMock-EB group but decreased in the Hyp-shSp1-EB-transplanted TA muscle ( $n = 30$ ; \*\*\* $p < 0.001$  versus Nor-shMock-EBs and ### $p < 0.001$  versus Hyp-shMock-EBs). (F) CSA of regenerating myofibers. TA muscle-transplanted cells were collected at 8 weeks after surgery and H&E staining and CSA ( $\mu$ m<sup>2</sup>) were measured. CSA of the regenerating myofibers in the Hyp-shSp1 group were significantly smaller than those in the Hyp-shMock group ( $n = 39$ ; \*\* $p < 0.01$ , \*\*\* $p < 0.001$  versus Nor-shMock-EBs and # $p < 0.01$ , ## $p < 0.001$  versus Hyp-shMock-EBs).

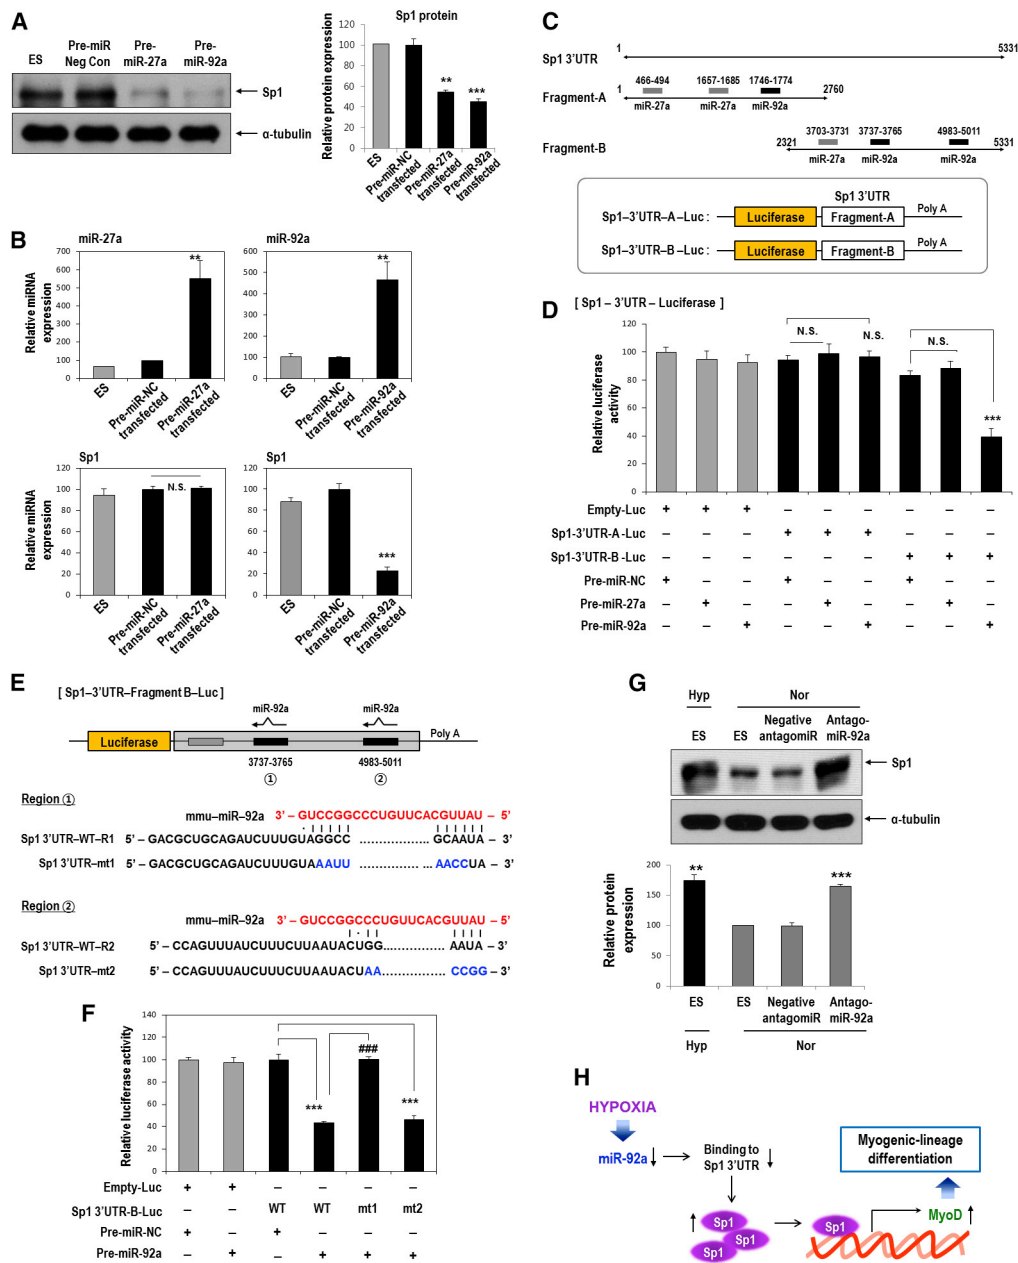

**Figure 8. miR-92a Reduces Sp1 mRNA and Protein by Directly Targeting the 3'UTR of Sp1, whereas miR-27a Suppresses Sp1 Protein but Not mRNA**

(A and B) C57 ESCs were transfected with 1 μg pre-miR-27a or pre-miR-92a miR precursors for 2 days under normoxia, and western blotting and real-time PCR were performed. (A) Sp1 western blotting after overexpression of pre-miR-27a or pre-miR-92a miR precursors. Sp1 protein was reduced by both miRNAs (n = 3; \*\*p < 0.01, \*\*\*p < 0.001). (B) Suppression of Sp1 mRNA only by pre-miR-92a but not by pre-miR-27a overexpression in C57 cells (n = 4; \*\*p < 0.01, \*\*\*p < 0.001). (C) Sequence alignment of putative miR-27a- and miR-92a-targeting sites within the 3' UTR of Sp1 (5,331 bp). Two luciferase reporter constructs are shown: fragment A, first half of the 3' UTR of Sp1 (1–2,760 bp); fragment B, last half of the 3' UTR of Sp1 (2,321–5,331 bp). (D) Luciferase activity reflecting Sp1 expression was suppressed by pre-miR-92a but not by both pre-miR-27a and pre-miR-NC (n = 6; \*\*\*p < 0.001). Sp1-3' UTR-A-Luc, luciferase reporter containing fragment A of the 3' UTR of the Sp1 gene; Sp1-3' UTR-B-Luc, luciferase reporter containing fragment B of the 3' UTR of the Sp1 gene. Differentiating C57 ESCs were co-transfected with various combinations of 1 μg luciferase reporter, 1 μg pre-miR-27a, 1 μg pre-miR-92a, and 1 μg pre-miR negative control, and luciferase activity was measured 24 h later. (E and F) miR-92a was found to directly target the 3' UTR of the Sp1 gene. (E) Schematic representation of luciferase reporter constructs showing the predicted structures of each base-paired WT (Sp1 3' UTR-WT) or mutant (Sp1 3' UTR-mt1, Sp1 3' UTR-mt2) fragment B of the Sp1 3' UTR. (F) Luciferase activity showed the reduction of Sp1 expression by pre-miR-92a and that this suppressive activity of pre-miR-92a was abrogated when the first target

(legend continued on next page)

from the mesoderm. In hypoxia-primed EBs, the myogenic regulatory factor MyoD and mature myofiber marker MyHC were significantly increased (Figure 1), whereas Myf5 did not respond to hypoxia. Previously, mice lacking MyoD showed normal muscle development but expressed approximately 4-fold higher levels of Myf5.<sup>35</sup> Myf5<sup>-/-</sup> animals also exhibit normal muscle development.<sup>36</sup> However, mice lacking both MyoD and Myf5 demonstrate the complete loss of myoblasts and myofibers,<sup>37</sup> indicating that these proteins can compensate for each other but that both are essential for the determination of myogenic precursors during development.

It was found that the upstream regulator that increases MyoD expression under conditions of hypoxia is not either of the well-known hypoxia-responsive transcriptional regulators, HIF1 $\alpha$  or HIF2 $\alpha$ , but rather, Sp1 (Figures 3 and 4). Sp1 is known to regulate the expression of genes involved in embryonic development and differentiation,<sup>12,13</sup> and its expression level changes during development.<sup>14</sup> Several studies have reported its involvement in muscle cell differentiation. Specifically, Sp1 knockdown downregulates gene expression associated with smooth muscle cell differentiation without affecting other cell lineage-related genes in mESCs.<sup>38,39</sup> The amplification of MDM2 in rhabdomyosarcoma cells inhibits MyoD function and inhibits muscle cell differentiation. However, the transfection of an Sp1-overexpression vector restores MyoD activity and C2C12 myoblast differentiation. In that report, MyoD expression was not enhanced by Sp1.<sup>40</sup> The human cardiac  $\alpha$ -actinin (HCA) promoter contains binding sites for Sp1, serum response factor, and the myogenic basic helix-loop-helix family; moreover, the cooperative DNA binding of these transcriptional activators is required for HCA transcription in C2C12 skeletal myoblast.<sup>41</sup> We demonstrated that hypoxia-mediated Sp1 upregulation increases MyoD expression, myogenic differentiation, and muscle regeneration and that Sp1-knockdown EBs could not mediate these effects even after hypoxic priming (Figures 5 and 6). Moreover, cells stained with Sp1 co-localized with MyoD immunofluorescence in reattached hypoxic-EBs (data not shown). Our results thus uncovered a previously unknown pathway, namely the hypoxia-Sp1-MyoD axis, which specifies and potentiates the direction of stem cell differentiation.

We previously reported that hypoxia-induced miR-26a targets HDAC6 and facilitates myogenic differentiation.<sup>9</sup> Here, we attempted to identify an upstream regulator that suppresses Sp1 expression and found that the miR-92a directly targets the 3' UTR of Sp1 and suppresses its expression. Conversely, miR-92a was found to be suppressed by hypoxia (Figures 7 and 8). When we use the strategy of antagomiR-92a, we can mimic the hypoxic condition to enhance the expression of Sp1/MyoD and muscle regeneration as shown in Figure 8G. Thus, based on these data, we can develop new therapeutic agents to suppress miR-92a and to facilitate regeneration of the

damaged muscle. There is a muscle-specific miRNA family, the members of which are called myomiRs, which is regulated during muscle differentiation and activity.<sup>16,42</sup> Moreover, hypoxamiRs comprise a specific subset of miRNAs regulated by hypoxia.<sup>43</sup> miR-92a and miR-27a are not known as myomiRs, whereas miR-92a was reported to be a hypoxamiR that is downregulated by hypoxia. Hypoxia regulates several fates of hypoxamiR including transcription, maturation, and function.<sup>43</sup> For the transcriptional regulation of miRNAs by hypoxia, HIFs play a predominant role. In addition, hypoxia-induced transcription factors such as nuclear factor  $\kappa$ B and p53 execute important regulatory functions in hypoxia-driven miRNA transcription.<sup>44</sup> Transcription factors such as HIF are upregulated under hypoxic conditions and directly activate the transcription of a subset of hypoxamiRs. In contrast, much less is known about the mechanisms responsible for hypoxia-induced gene repression. At least 10 transcriptional repressors including repressor element-1 silencing transcription factor (REST) have been reported,<sup>45</sup> and hypoxia selectively represses some hypoxamiRs through less characterized mechanisms. It is likely that transcriptional repressors participate in the hypoxia-driven repression of hypoxamiRs.

In addition to transcriptional control, hypoxia regulates Drosha and Dicer to mediate hypoxamiR maturation and function. It was reported that Drosha and Dicer mRNA and protein levels were decreased in the lung tissue of rats after exposure to hypoxia. When primary pulmonary fibroblasts are exposed to hypoxia, the expression of Drosha mRNA was decreased.<sup>46</sup> It was also reported that some subsets of miRNAs are significantly downregulated in hypoxic human umbilical vein endothelial cells (HUVECs), and that Dicer mRNA and protein levels are decreased in a Von Hippel Lindau (VHL)-dependent manner.<sup>47</sup> miR-92a was found to be repressed under hypoxia in our experiments (Figure 7B); this might be possibly through a hypoxia-driven transcriptional repressor, and/or the suppression of miRNA-processing proteins such as Drosha and Dicer. However, further studies focusing on the relative contributions of transcriptional and posttranscriptional events to the regulation of miR-92a by hypoxia will be needed. miR-27a is also known as a hypoxamiR, but its expression pattern varies. The expression of miR-27a was found to be suppressed by hypoxia in our work (Figure 7B) and in hippocampal neurons,<sup>48</sup> whereas its expression was reported to increase by hypoxia or HIF1 $\alpha$  in pulmonary vascular cells and cancer cells.<sup>49,50</sup> In our current study, miR-27a overexpression reduced Sp1 "protein" level but did not target the 3' UTR of Sp1 or suppress "mRNA" level (Figures 8A–8D). Further work will be required to clarify these issues.

In conclusion, the hypoxic priming of EBs induced the commitment toward the myogenic lineage through miRNA-92a/Sp1/MyoD axis, which was not only demonstrated *in vitro* but also confirmed *in vivo*.

---

site (3,737–3,765 bp) of the 3' UTR was mutated (n = 6; \*\*\*p < 0.001, ###p < 0.001). C57 ESCs were co-transfected with various combinations of 1  $\mu$ g WT, 1  $\mu$ g mutant Sp1 3' UTR, 1  $\mu$ g pre-miR-92a, and 1  $\mu$ g pre-miR-NC, and luciferase activity was measured 24 h later. (G) Sp1 was increased even under normoxic conditions. C57 mESCs were transfected for 24 h with an antagomiR against miR-92a (50 nM). Hypoxia: 16 h (n = 3; \*\*p < 0.01, \*\*\*p < 0.001). (H) Proposed model for stimulation of the myogenic differentiation of mESCs through the miR-92a/Sp1/MyoD axis.

We observed enhanced muscle regeneration after the transplantation of hypoxia-primed EBs into a muscle-damaged limb. Accordingly, the hypoxic priming of stem/progenitor cells before transplantation or the modulation of Sp1 expression by pharmacological agents, such as antagomiR-92a, might be plausible new therapeutic strategy to enhance muscle repair in the regenerative medicine.

## MATERIALS AND METHODS

### Cell Culture and Differentiation

Undifferentiated E14 mESCs and C57BL/6-background mESCs (C57-mESCs, accession number SCRC-1002; ATCC) were cultured on mitomycin C (Sigma, St. Louis, MO, USA)-treated mouse embryonic fibroblast feeder layers in DMEM (GIBCO, Grand Island, NY, USA) with 20% FBS (HyClone, Fisher Scientific, Pittsburgh, PA, USA), 1% penicillin/streptomycin (GIBCO, Grand Island, NY), 0.1 mM  $\beta$ -mercaptoethanol (BME; Sigma, St. Louis, MO, USA), 1% non-essential amino acids (GIBCO, Grand Island, NY), 2 mM L-glutamine, and 1,000 U/mL leukemia inhibitory factor (LIF; Millipore, Billerica, MA, USA). We considered the C57-ESCs obtained directly from the ATCC as “passage 1,” and performed all experiments in this manuscript with cells between passages 8 and 14. For hypoxic culture conditions, cells were incubated in a Hypoxia Chamber (Forma Scientific, Marietta, OH, USA) under low oxygen tension (1% O<sub>2</sub>, 5% CO<sub>2</sub>, and balanced with N<sub>2</sub>).

EBs were formed by the hanging drop method (one droplet containing 500 cells/20  $\mu$ L) in the absence of LIF and feeder cells. To induce spontaneous differentiation, we cultured EBs on 0.3% gelatin-coated plates in DMEM/10% FBS. For *in vitro* myogenic-lineage differentiation, EBs were plated on 0.3% gelatin-coated culture dishes in DMEM/10% FBS for 1 day and further incubated, which was followed by replacement with specific media with some modification, specifically SkIM,<sup>32</sup> high-glucose DMEM (GIBCO, Grand Island, NY), 10% FBS (HyClone, Fisher Scientific, Pittsburgh, PA, USA), 5% horse serum (Sigma, St. Louis, MO, USA), 1% penicillin/streptomycin (GIBCO, Grand Island, NY), 1% non-essential amino acids (GIBCO, Grand Island, NY), 0.1 mM BME (Sigma, St. Louis, MO, USA), and recombinant mouse vascular endothelial growth factor (VEGF) (100 ng/mL; R&D Systems, Minneapolis, MN, USA).

### Real-Time PCR Analysis

Total RNA was isolated using the QIAshredder and RNeasy mini kit (QIAGEN, Valencia, CA, USA). Up to 1  $\mu$ g of RNA was converted into cDNA according to the instructions of the PrimeScript 1st strand cDNA Synthesis Kit (Takara, Kyoto, Japan). Real-time PCR was performed using the SYBR Green PCR Master Mix (Roche, Eugene, OR, USA) with specific primers (Table S1). Real-time PCR was performed using an ABI PRISM-7500 sequence detection system (Applied Biosystems, Foster City, CA, USA). 18S rRNA was simultaneously run as a control and used for normalization.

### ChIP Assay

mESCs were fixed with 1% formaldehyde for 10 min, which was quenched by adding 125 mM glycine (pH 2.2) for 5 min; the cells

were then lysed with ChIP lysis buffer (50 mM Tris-HCl [pH 8.0], 1 mM EDTA, 0.5% Triton X-100, 0.1% sodium dodecyl chloride, 0.1% sodium deoxy sulfate, 140 mM NaCl, 1 mM PMSF, and a 1 $\times$  protease inhibitor cocktail (Roche, Eugene, OR, USA). Lysed samples are sonicated to shear DNA into 500~1,500-bp fragments using the Bioruptor (Diagenode, Denville, NJ, USA). Anti-Sp1 (Millipore, Billerica, MA, USA) or normal rabbit immunoglobulin G (Cell Signaling Technology, Danvers, MA, USA) were used for immunoprecipitation of the DNA fragments. Protein A/G agarose beads (Abcam, Cambridge, UK) were added to pull down the target-antibody complexes, which were washed four times with ChIP wash buffer (Santa Cruz Biotechnology, Dallas, TX, USA). The crosslinking was reversed by heating at 65°C for 16 h, and DNA was recovered using the QIAquick PCR Purification Kit (QIAGEN, Valencia, CA, USA). The PCR products were resolved on 2% agarose gels stained with ethidium bromide. The PCR primers were designed to amplify a region of the *MyoD* promoter harboring Sp1-binding sites and the negative binding site, as shown in Table S1.

### Western Blot Assays

Cells were harvested and lysed in lysis buffer containing protease inhibitors (Roche, Eugene, OR, USA). Total protein (10~30  $\mu$ g) was immunoblotted with specific primary antibodies as follows: anti-Sp1 (Millipore, Billerica, MA, USA), anti-MyoD (Santa Cruz Biotechnology, Dallas, TX, USA), anti-Myf5 (Santa Cruz Biotechnology, Dallas, TX, USA), anti-Pax3 (DSHB, Iowa City, Iowa, USA), anti-HIF1 $\alpha$  (Cayman Chemical, Ann Arbor, MI, USA), anti-HIF2 $\alpha$  (Novus Biologicals, Littleton, CO, USA), anti-AP2 $\alpha$  (Abcam, Cambridge, UK), and anti- $\alpha$ -tubulin (Calbiochem, La Jolla, CA, USA). This was followed by incubation for 1 h with horseradish peroxidase (HRP)-conjugated secondary antibody (Santa Cruz Biotechnology, Dallas, TX, USA). Immunoreactive bands were visualized by enhanced chemiluminescence using the Novex ECL Chemiluminescent Substrate Reagent (Invitrogen Life Technologies, Carlsbad, CA, USA). Quantification of band intensity was performed using ImageJ software (NIH, Bethesda, MD, USA) and normalized to the intensity of  $\alpha$ -tubulin.

### miRNA Microarray and miRNA Real-Time PCR Analysis

Total RNA from cultures exposed to three experimental conditions (mESCs cultured for 16 h under normoxia, EBs cultured for 16 h under normoxia, EBs cultured for 16 h under hypoxia) was prepared using a Trizol Extraction Kit (Invitrogen, Life Technologies, Carlsbad, CA, USA) according to the manufacturer's instructions. miRNA microarrays were performed by Genomictree (Daejeon, Korea). In brief, 100 ng of total RNA was labeled and hybridized to miRNA microarrays (Agilent Technologies, Santa Clara, CA, USA) using the mouse miRNA Microarray Kit protocol for use with Agilent miRNA microarrays Version 1.0. Hybridization signals were detected with a DNA microarray scanner G2505B (Agilent Technologies, Santa Clara, CA, USA) and the scanned images were analyzed using Agilent feature extraction software (v9.5.3.1). Data were analyzed using GeneSpring GX 7.3.1 software (Agilent Technologies) and normalized as follows: (1) values below 0.01 were set to 0.01; (2) to make

comparisons between one-color expression profiles, each measurement was divided by the 50<sup>th</sup> percentile of all measurements from the same species. The data presented in this manuscript have been deposited into the NCBI Gene Expression Omnibus and are accessible through GEO: GSE125487 (mouse). For the detection of miRNA levels, single-stranded cDNA was synthesized using the Taqman miRNA RT Kit (Applied Biosystems, Foster City, CA, USA). Real-time PCR of miRNA was performed using TaqMan miRNA assays (Applied Biosystems, Foster City, CA, USA) as follows: miR-7a-5p (assay ID 000268), miR-7b-3p (assay ID 002555), miR-27a-3p (assay ID 000408), miR-92a-3p (assay ID 000430), miR-128-3p (assay ID 002216), miR-290-3p (assay ID 002591), miR-335-3p (assay ID 002185), miR-466c-5p (assay ID 463771\_mat), and U6 small nuclear RNA (assay ID 001973) for an internal control. Primer information is outlined in [Table S1](#).

#### Plasmid Construction, Oligonucleotides, and Transfection

For Sp1 knockdown, we used the MISSION TRC shRNA Target Set (TRCN0000071603) or the control sh-plasmid (MISSION Non-Target shRNA Control SHC002; Sigma, St. Louis, MO, USA). C57 ESCs were transfected with Metafetamin (Biotex Laboratories, Edmonton, Alberta, Canada) and selected by puromycin treatment (10 µg/mL; Sigma, St. Louis, MO, USA) for stable transfection. An Sp1 overexpression vector containing the *Sp1* CDS (NM\_013672.2) was synthesized by PCR and cloned into pcDNA3.1 (Invitrogen, Carlsbad, CA, USA). Primer information can be found in [Table S2](#).

miRNA mimic oligomers, miRNA precursors, and an miRNA inhibitor were purchased from ThermoFisher (ThermoFisher Scientific, Waltham, MA, USA) as follows: mirVana miRNA mimics: mmu-miR-7a-5p (MC10047), mmu-miR-7b-3p (MC19214), mmu-miR-27a-3p (MC10939), mmu-miR-92a-3p (MC10312), mmu-miR-128-3p (MC11746), mmu-miR-290a-3p (MC12487), mmu-miR-335-3p (MC13018), mmu-miR-466c-5p (MC19405), miRNA mimic negative control (4464058); pre-miR miRNA precursors: pre-miR-27a-3p precursor (PM10939), pre-miR-92a-3p precursor (PM10312), pre-miR miRNA precursor control (AM17110). mirVana miRNA inhibitors: mmu-miR-92a-3p (MH10312), mirVana miRNA inhibitor negative control (4464078). Transfection was performed using Metafetamin (Biotex, Edmonton, Alberta, Canada) according to the manufacturer's protocol.

#### Luciferase Assays for *MyoD* Promoter, Sp1 3' UTR, and miRNA Target Validation

The promoter region of *MyoD*, containing putative AP2 $\alpha$ - and Sp1-binding sites, was obtained by genomic PCR and cloned into the pGL4 basic luciferase reporter vector (Promega, Madison, WI, USA). Deletion mutants without each Sp1-binding site in the *MyoD* promoter region were generated using the primer set described in [Table S2](#) with the QuickChange II Site-Directed Mutagenesis System (Staratagene, La Jolla, CA, USA), which was followed by sequence verification. Luciferase assays were performed using the Luciferase Assay System kit (Promega, Madison, WI, USA) with a GloMax luminometer (Promega, Madison, WI, USA). The relative luciferase

activity was normalized as relative light units to  $\beta$ -galactosidase activity. The *Sp1* 3' UTR was purchased from GeneCopoeia (MmiT030998, Rockville, MD, USA) and subcloned downstream of the *Renilla* luciferase gene in psiCHECK-2 (Promega, Madison, WI, USA). Because the *Sp1* 3' UTR is greater than 5 kb, the UTR was broken up into shorter fragments and cloned into two constructs using overlapping sequences. Site-directed mutagenesis of the miR-92a-binding site in the Sp1 3' UTR was achieved using QuickChange II Site-Directed Mutagenesis System (Staratagene, La Jolla, CA, USA), which was followed by sequence verification. For reporter assays, C57 ESCs cultured in the absence of LIF and feeder cells were transfected with various combinations of effector plasmids. Luciferase assays were performed using the Dual-Glo luciferase assay system kit (Promega, Madison, WI, USA) with a GloMax luminometer (Promega, Madison, WI, USA). The transfection efficiency was normalized to firefly luciferase activity as an internal control, as the psiCHECK-2 Vector also contains a constitutively expressed firefly luciferase gene. Primer sequences for cloning are described in [Table S2](#).

#### Cardiotoxin-Muscle Injury Model

All animal experiments were performed with approval from the Institutional Animal Care and Use Committee of Seoul National University Hospital (SNU-170524-2). For the rota-rod test, male C57BL/6 (8 weeks old) mice were anesthetized and 50 µL of CTX (10 µM, Sigma, St. Louis, MO, USA) was injected into both TA muscles of each mouse to induce muscle injury.<sup>9,51</sup> One day later, cells from shMock-EBs/normoxia, shMock-EBs/hypoxia, or shSp1-EBs/hypoxia groups (total cell numbers corresponding to  $5 \times 10^4/50$  µL PBS) were transplanted into the TA muscle of each group. As a sham control, PBS was injected into the TA muscle. EBs were labeled with DiI Dye (2 µg/mL; Molecular Probes, Eugene, OR, USA) for 30 min before inducing EB formation via the hanging drop method to trace differentiation. The TA muscles were harvested and histological analysis was performed to evaluate differentiation into skeletal muscle cells in injured muscles.

#### Rota-Rod Test

After the procedures, we evaluated the ability of mice to remain on a rotating rod (Panlab Rota-Rods LE. 8200, Harvard Apparatus, Holliston, MA, USA).<sup>51</sup> For this, we measured the time it took the mouse to fall off the rod, which was rotating under continuous acceleration (from 5 to 40 rpm) as a measurement of motor function competence. We performed four trials for each mouse, measured each latency time on the rod, and calculated the average. Mice were allowed to rest for at least 5 min between each trial. For the mouse habituating period, before CTX muscle injury, the mice stayed on a stationary drum for 3 min and then ran on the rotating rod up to three times.

#### Immunofluorescence Staining

Differentiated cells from EBs on a  $\mu$ -Dish<sup>35mm high</sup> (ibidi, Planegg, Germany) were fixed with 4% PFA, blocked with blocking buffer (0.5% goat serum, 0.1% Triton X-100, 1% BSA-PBS), and labeled with specific markers as follows: anti-MyoD (Dako, Burlingame, CA, USA), anti-MyHC (R&D Systems, Minneapolis, MN, USA),

and anti-Sp1 (Millipore, Billerica, MA, USA). The samples were then incubated with Alexa 488- or Alexa 555-conjugated (Invitrogen Life Technologies, Carlsbad, CA, USA) secondary antibodies for 2 h in the dark. After cell transplantation, the TA muscle was excised, rinsed with PBS, and frozen in liquid nitrogen to analyze the tissues of CTX-injured mice. Histological tissue sections (4~8- $\mu$ m-thick) were prepared from snap-frozen tissue samples, fixed with acetone, blocked in 1% BSA, and incubated with anti-laminin 2 $\alpha$  (Cambridge, UK), which was followed by incubation with Alexa 488 (Invitrogen Life Technologies, Carlsbad, CA, USA). The nuclei were stained with DAPI (Thermo Fisher Scientific Waltham, MA, USA) and mounted using fluorescent mounting medium (DAKO, Burlingame, CA, USA). The images of each section were obtained using an LSM710 confocal microscope (Carl Zeiss, Oberkochen, Germany). For the quantification of regenerating myofibers, at least five randomly selected fields from transverse-sectioned slides from four different mice were analyzed.

#### Morphometric Analysis Based on H&E Staining

Paraffin sections (4–6- $\mu$ m-thick) of mouse TA muscles were stained by H&E using standard protocols. The microscopic images were obtained using an Olympus TH4-200 microscope (Olympus, Tokyo, Japan). Myofiber cross-sectional areas (CSA;  $\mu$ m<sup>2</sup>) were measured using H&E-stained cross-sections with ImageJ software (<https://imagej.nih.gov/ij/>). For quantification, 8 to 10 randomly selected fields from transverse-sectioned slides from four different mice were analyzed.<sup>52</sup>

#### Statistical Analysis

The results are expressed as means  $\pm$  SEM. Comparisons between two groups were performed using a Student's t test. p values < 0.05 were considered statistically significant. All analyses were performed using SPSS 17.0 (SPSS, Chicago, IL, USA) or Excel.

#### SUPPLEMENTAL INFORMATION

Supplemental Information can be found online at <https://doi.org/10.1016/j.ymthe.2019.08.014>.

#### AUTHOR CONTRIBUTIONS

Conceived the project and experimental design: S.-Y.L. Conducted experiments: S.-Y.L., J.Y., J.H.P., W.J.K., and J.L. Assisted with vector construction and experiments: W.J.K., S.-Y.K., I.H., and C.-S.L. Contributed to data analysis: H.K.S. and E.J.L. Performed data analysis, interpretation, and wrote manuscript: S.-Y.L. and J.Y. Contributed to revising manuscript and discussion: H.-S.K. All authors read and approved the final manuscript.

#### CONFLICTS OF INTEREST

The authors declare no competing interests.

#### ACKNOWLEDGMENTS

This study is supported by Technology R&D Project “Strategic Center of Cell and Bio Therapy for Heart, Diabetes & Cancer (HI17C2085)” and “Korea Research-Driven Hospital (HI14C1277)” through the Korea Health Industry Development Institute (KHIDI), funded by

the Ministry of Health & Welfare, Republic of Korea, and by Basic Science Research Program through the National Research Foundation of Korea (NRF) funded by the Ministry of Education (2017R1D1A1B03034649).

#### REFERENCES

1. Itskovitz-Eldor, J., Schuldiner, M., Karsenti, D., Eden, A., Yanuka, O., Amit, M., Soreq, H., and Benvenisty, N. (2000). Differentiation of human embryonic stem cells into embryoid bodies compromising the three embryonic germ layers. *Mol. Med.* 6, 88–95.
2. Lee, S.W., Lee, Y.M., Bae, S.K., Murakami, S., Yun, Y., and Kim, K.W. (2000). Human hepatitis B virus X protein is a possible mediator of hypoxia-induced angiogenesis in hepatocarcinogenesis. *Biochem. Biophys. Res. Commun.* 268, 456–461.
3. Kim, M.S., Kwon, H.J., Lee, Y.M., Baek, J.H., Jang, J.E., Lee, S.W., Moon, E.J., Kim, H.S., Lee, S.K., Chung, H.Y., et al. (2001). Histone deacetylases induce angiogenesis by negative regulation of tumor suppressor genes. *Nat. Med.* 7, 437–443.
4. Lee, S.W., Kim, W.J., Choi, Y.K., Song, H.S., Son, M.J., Gelman, I.H., Kim, Y.J., and Kim, K.W. (2003). SSeCKS regulates angiogenesis and tight junction formation in blood-brain barrier. *Nat. Med.* 9, 900–906.
5. Semenza, G.L. (2014). Oxygen sensing, hypoxia-inducible factors, and disease pathophysiology. *Annu. Rev. Pathol.* 9, 47–71.
6. Semenza, G.L. (1999). Regulation of mammalian O<sub>2</sub> homeostasis by hypoxia-inducible factor 1. *Annu. Rev. Cell Dev. Biol.* 15, 551–578.
7. Youn, S.W., Lee, S.W., Lee, J., Jeong, H.K., Suh, J.W., Yoon, C.H., Kang, H.J., Kim, H.Z., Koh, G.Y., Oh, B.H., et al. (2011). COMP-Ang1 stimulates HIF-1 $\alpha$ -mediated SDF-1 overexpression and recovers ischemic injury through BM-derived progenitor cell recruitment. *Blood* 117, 4376–4386.
8. Lee, S.W., Jeong, H.K., Lee, J.Y., Yang, J., Lee, E.J., Kim, S.Y., Youn, S.W., Lee, J., Kim, W.J., Kim, K.W., et al. (2012). Hypoxic priming of mESCs accelerates vascular-lineage differentiation through HIF1-mediated inverse regulation of Oct4 and VEGF. *EMBO Mol. Med.* 4, 924–938.
9. Lee, S.W., Yang, J., Kim, S.Y., Jeong, H.K., Lee, J., Kim, W.J., Lee, E.J., and Kim, H.S. (2015). MicroRNA-26a induced by hypoxia targets HDAC6 in myogenic differentiation of embryonic stem cells. *Nucleic Acids Res.* 43, 2057–2073.
10. Cook, T., Gebelein, B., and Urrutia, R. (1999). Sp1 and its likes: biochemical and functional predictions for a growing family of zinc finger transcription factors. *Ann. N Y Acad. Sci.* 880, 94–102.
11. Wierstra, I. (2008). Sp1: emerging roles—beyond constitutive activation of TATA-less housekeeping genes. *Biochem. Biophys. Res. Commun.* 372, 1–13.
12. Marin, M., Karis, A., Visser, P., Grosveld, F., and Philipsen, S. (1997). Transcription factor Sp1 is essential for early embryonic development but dispensable for cell growth and differentiation. *Cell* 89, 619–628.
13. Thomas, K., Wu, J., Sung, D.Y., Thompson, W., Powell, M., McCarrey, J., Gibbs, R., and Walker, W. (2007). SP1 transcription factors in male germ cell development and differentiation. *Mol. Cell. Endocrinol.* 270, 1–7.
14. Saffer, J.D., Jackson, S.P., and Annarella, M.B. (1991). Developmental expression of Sp1 in the mouse. *Mol. Cell. Biol.* 11, 2189–2199.
15. Philipsen, S., and Suske, G. (1999). A tale of three fingers: the family of mammalian Sp/XKLF transcription factors. *Nucleic Acids Res.* 27, 2991–3000.
16. Heinrich, E.M., and Dimmeler, S. (2012). MicroRNAs and stem cells: control of pluripotency, reprogramming, and lineage commitment. *Circ. Res.* 110, 1014–1022.
17. Bartel, D.P. (2004). MicroRNAs: genomics, biogenesis, mechanism, and function. *Cell* 116, 281–297.
18. Lee, H.J. (2013). Exceptional stories of microRNAs. *Exp. Biol. Med.* (Maywood) 238, 339–343.
19. Suh, M.R., Lee, Y., Kim, J.Y., Kim, S.K., Moon, S.H., Lee, J.Y., Cha, K.Y., Chung, H.M., Yoon, H.S., Moon, S.Y., et al. (2004). Human embryonic stem cells express a unique set of microRNAs. *Dev. Biol.* 270, 488–498.
20. Krichevsky, A.M., King, K.S., Donahue, C.P., Khrapko, K., and Kosik, K.S. (2003). A microRNA array reveals extensive regulation of microRNAs during brain development. *RNA* 9, 1274–1281.

21. Lagos-Quintana, M., Rauhut, R., Yalcin, A., Meyer, J., Lendeckel, W., and Tuschl, T. (2002). Identification of tissue-specific microRNAs from mouse. *Curr. Biol.* *12*, 735–739.
22. Alvarez-Garcia, I., and Miska, E.A. (2005). MicroRNA functions in animal development and human disease. *Development* *132*, 4653–4662.
23. Esquela-Kerscher, A., and Slack, F.J. (2006). Oncomirs - microRNAs with a role in cancer. *Nat. Rev. Cancer* *6*, 259–269.
24. Krützfeldt, J., and Stoffel, M. (2006). MicroRNAs: a new class of regulatory genes affecting metabolism. *Cell Metab.* *4*, 9–12.
25. Tedesco, F.S., Dellavalle, A., Diaz-Manera, J., Messina, G., and Cossu, G. (2010). Repairing skeletal muscle: regenerative potential of skeletal muscle stem cells. *J. Clin. Invest.* *120*, 11–19.
26. Ozasa, S., Kimura, S., Ito, K., Ueno, H., Ikezawa, M., Matsukura, M., Yoshioka, K., Araki, K., Yamamura, K.I., Abe, K., et al. (2007). Efficient conversion of ES cells into myogenic lineage using the gene-inducible system. *Biochem. Biophys. Res. Commun.* *357*, 957–963.
27. Wang, Y.X., and Rudnicki, M.A. (2011). Satellite cells, the engines of muscle repair. *Nat. Rev. Mol. Cell Biol.* *13*, 127–133.
28. Tapscott, S.J., Davis, R.L., Thayer, M.J., Cheng, P.F., Weintraub, H., and Lassar, A.B. (1988). MyoD1: a nuclear phosphoprotein requiring a Myc homology region to convert fibroblasts to myoblasts. *Science* *242*, 405–411.
29. Mokalled, M.H., Johnson, A.N., Creemers, E.E., and Olson, E.N. (2012). MASTR directs MyoD-dependent satellite cell differentiation during skeletal muscle regeneration. *Genes Dev.* *26*, 190–202.
30. Mitchell, D.L., and DiMario, J.X. (2010). AP-2 alpha suppresses skeletal myoblast proliferation and represses fibroblast growth factor receptor 1 promoter activity. *Exp. Cell Res.* *316*, 194–202.
31. Mummaneni, P., Yates, P., Simpson, J., Rose, J., and Turker, M.S. (1998). The primary function of a redundant Sp1 binding site in the mouse *aprt* gene promoter is to block epigenetic gene inactivation. *Nucleic Acids Res.* *26*, 5163–5169.
32. Mizuno, Y., Chang, H., Umeda, K., Niwa, A., Iwasa, T., Awaya, T., Fukada, S., Yamamoto, H., Yamanaka, S., Nakahata, T., and Heike, T. (2010). Generation of skeletal muscle stem/progenitor cells from murine induced pluripotent stem cells. *FASEB J.* *24*, 2245–2253.
33. Chang, H., Yoshimoto, M., Umeda, K., Iwasa, T., Mizuno, Y., Fukada, S., Yamamoto, H., Motohashi, N., Miyagoe-Suzuki, Y., Takeda, S., et al. (2009). Generation of transplantable, functional satellite-like cells from mouse embryonic stem cells. *FASEB J.* *23*, 1907–1919.
34. Patton, B.L., Connoll, A.M., Martin, P.T., Cunningham, J.M., Mehta, S., Pestronk, A., Miner, J.H., and Sanes, J.R. (1999). Distribution of ten laminin chains in dystrophic and regenerating muscles. *Neuromuscul. Disord.* *9*, 423–433.
35. Rudnicki, M.A., Braun, T., Hinuma, S., and Jaenisch, R. (1992). Inactivation of MyoD in mice leads to up-regulation of the myogenic HLH gene Myf-5 and results in apparently normal muscle development. *Cell* *71*, 383–390.
36. Kaul, A., Köster, M., Neuhaus, H., and Braun, T. (2000). Myf-5 revisited: loss of early myotome formation does not lead to a rib phenotype in homozygous Myf-5 mutant mice. *Cell* *102*, 17–19.
37. Kassar-Duchossoy, L., Gayraud-Morel, B., Gomès, D., Rocancourt, D., Buckingham, M., Shinin, V., and Tajbakhsh, S. (2004). Mrf4 determines skeletal muscle identity in Myf5:MyoD double-mutant mice. *Nature* *431*, 466–471.
38. Zhang, L., Jin, M., Margariti, A., Wang, G., Luo, Z., Zampetaki, A., Zeng, L., Ye, S., Zhu, J., and Xiao, Q. (2010). Sp1-dependent activation of HDAC7 is required for platelet-derived growth factor-BB-induced smooth muscle cell differentiation from stem cells. *J. Biol. Chem.* *285*, 38463–38472.
39. Xiao, Q., Luo, Z., Pepe, A.E., Margariti, A., Zeng, L., and Xu, Q. (2009). Embryonic stem cell differentiation into smooth muscle cells is mediated by Nox4-produced H<sub>2</sub>O<sub>2</sub>. *Am. J. Physiol. Cell Physiol.* *296*, C711–C723.
40. Guo, C.S., Degnin, C., Fiddler, T.A., Stauffer, D., and Thayer, M.J. (2003). Regulation of MyoD activity and muscle cell differentiation by MDM2, pRb, and Sp1. *J. Biol. Chem.* *278*, 22615–22622.
41. Biesiada, E., Hamamori, Y., Kedes, L., and Sartorelli, V. (1999). Myogenic basic helix-loop-helix proteins and Sp1 interact as components of a multiprotein transcriptional complex required for activity of the human cardiac alpha-actin promoter. *Mol. Cell Biol.* *19*, 2577–2584.
42. McCarthy, J.J. (2011). The MyomiR network in skeletal muscle plasticity. *Exerc. Sport Sci. Rev.* *39*, 150–154.
43. Nallamshetty, S., Chan, S.Y., and Loscalzo, J. (2013). Hypoxia: a master regulator of microRNA biogenesis and activity. *Free Radic. Biol. Med.* *64*, 20–30.
44. Cummins, E.P., and Taylor, C.T. (2005). Hypoxia-responsive transcription factors. *Pflugers Arch.* *450*, 363–371.
45. Cavadas, M.A.S., Cheong, A., and Taylor, C.T. (2017). The regulation of transcriptional repression in hypoxia. *Exp. Cell Res.* *356*, 173–181.
46. Caruso, P., MacLean, M.R., Khanin, R., McClure, J., Soon, E., Southgate, M., MacDonald, R.A., Greig, J.A., Robertson, K.E., Masson, R., et al. (2010). Dynamic changes in lung microRNA profiles during the development of pulmonary hypertension due to chronic hypoxia and monocrotaline. *Arterioscler. Thromb. Vasc. Biol.* *30*, 716–723.
47. Ho, J.J., Metcalf, J.L., Yan, M.S., Turgeon, P.J., Wang, J.J., Chalsev, M., Petruzzello-Pellegrini, T.N., Tsui, A.K., He, J.Z., Dhamko, H., et al. (2012). Functional importance of Dicer protein in the adaptive cellular response to hypoxia. *J. Biol. Chem.* *287*, 29003–29020.
48. Cai, Q., Wang, T., Yang, W.J., and Fen, X. (2016). Protective mechanisms of microRNA-27a against oxygen-glucose deprivation-induced injuries in hippocampal neurons. *Neural Regen. Res.* *11*, 1285–1292.
49. Kang, B.Y., Park, K.K., Green, D.E., Bijli, K.M., Searles, C.D., Sutliff, R.L., and Hart, C.M. (2013). Hypoxia mediates mutual repression between microRNA-27a and PPAR $\gamma$  in the pulmonary vasculature. *PLoS ONE* *8*, e79503.
50. Jin, F., Yang, R., Wei, Y., Wang, D., Zhu, Y., Wang, X., et al. (2019). HIF-1 $\alpha$ -induced miR-23a approximately 27a approximately 24 cluster promotes colorectal cancer progression via reprogramming metabolism. *Cancer Lett.* *440–441*, 211–222.
51. Darabi, R., Gehlbach, K., Bachoo, R.M., Kamath, S., Osawa, M., Kamm, K.E., Kyba, M., and Perlingeiro, R.C. (2008). Functional skeletal muscle regeneration from differentiating embryonic stem cells. *Nat. Med.* *14*, 134–143.
52. Liu, N., Williams, A.H., Maxeiner, J.M., Bezprozvannaya, S., Shelton, J.M., Richardson, J.A., Bassel-Duby, R., and Olson, E.N. (2012). microRNA-206 promotes skeletal muscle regeneration and delays progression of Duchenne muscular dystrophy in mice. *J. Clin. Invest.* *122*, 2054–2065.

YMTHE, Volume 28

## **Supplemental Information**

**The MicroRNA-92a/Sp1/MyoD Axis Regulates**

**Hypoxic Stimulation of Myogenic Lineage**

**Differentiation in Mouse Embryonic Stem Cells**

**Seo-Yeon Lee, Jimin Yang, Jung Hwa Park, Hwa Kyoung Shin, Woo Jean Kim, Su-Yeon Kim, Eun Ju Lee, Injoo Hwang, Choon-Soo Lee, Jaewon Lee, and Hyo-Soo Kim**



## Supplementary Figure legends

**Supplementary Figure S1. Effect of HIF1 $\alpha$  or HIF2 $\alpha$  overexpression on HIF-responsive genes in C57 ESCs under normoxia.** Quantitative real-time PCR for bFGF and VEGF suggests that HIF plasmids were functional (n = 3; \*\*p < 0.01, \*\*\*p < 0.001). ESCs were transfected with 1  $\mu$ g pEGFP-HIF1 $\alpha$  or pEGFP-HIF2 $\alpha$  for 24 h, allowed to form EBs for 3 days under normoxic conditions, and real-time PCR were performed.

**Supplementary Figure S2. Real-time PCR for *Sp1* and *MyoD*.** (A) *Sp1* mRNA was significantly decreased by the transient transfection of shSp1 compared to that with the non-target shRNA control (shMock) (n = 4). (B) Sp1 knockdown suppressed the increased expression of *MyoD* mRNA even under hypoxia (n = 4). \*\*\*p < 0.001 versus Nor-EBs ###p < 0.001 versus Hyp-shMock-EBs. ESCs were transfected with 1  $\mu$ g shMock or shSp1 for 24 h, formed EBs for 3 days under normoxia, and further incubated for 16 h under normoxic or hypoxic conditions.

**Supplementary Figure S3. Generation of Sp1-knockdown stable cells.** *Sp1* mRNA was remarkably reduced in all four Sp1 knockdown C57 EB clones. C57 ESCs were transfected with 1  $\mu$ g shMock or shSp1 for 24 h, and further selected by puromycin treatment.

**Supplementary Figure S4.** Quantification of western blotting for Sp1. C57 ESCs were transfected with miRNA mimic-oligomer for 2 days under normoxic conditions, and western blotting was performed. miR-NC: miRNA-negative control; n=3, \*\*p<0.01, \*\*\*p<0.001).

**Supplementary Table 1.** Primers used for real-time PCR and ChIP assay

| Primer        |         | Sequence                     | Size (bp) |
|---------------|---------|------------------------------|-----------|
| Sp1           | Forward | 5'-CACCCCTAACACCCATTGCCT-3'  | 187       |
|               | Reverse | 5'-TCCATGATCACCTGGGGTGT-3'   |           |
| MyoD          | Forward | 5'-TGGAGATCCTGCGCAACGCC-3'   | 138       |
|               | Reverse | 5'-TGTAGTGCTCGCTGCCACGG-3'   |           |
| Myf5          | Forward | 5'-CCACCATGCGCGAGCGTAGA-3'   | 194       |
|               | Reverse | 5'-GCTCTGTCCCGGCAGGCTGTA-3'  |           |
| MyoG          | Forward | 5'-CTGCGCAGCGCCATCCAGTA-3'   | 222       |
|               | Reverse | 5'-GGCGTCTGTAGGGTCAGCCG-3'   |           |
| AP2 $\alpha$  | Forward | 5'-CTCCAGAAGGGGTGTGCAT-3'    | 171       |
|               | Reverse | 5'-CGGGCCTGAAGAGGTTACTC-3'   |           |
| HIF1 $\alpha$ | Forward | 5'-TCCTGGAAACGAGTGAAAGG-3'   | 176       |
|               | Reverse | 5'-CTGCCTTGTATGGGAGCATT-3'   |           |
| HIF2 $\alpha$ | Forward | 5'-CTTGGAGGGTTTCATTGCTG-3'   | 246       |
|               | Reverse | 5'-ACCGTGCACCTTCATCCTCAT-3'  |           |
| 18s rRNA      | Forward | 5'-GTAACCCGTTGAACCTT-3'      | 151       |
|               | Reverse | 5'-CCATCCAATCGGTAGTAGCG-3'   |           |
| OCT4          | Forward | 5'-GAAGCCCTCCCTACAGCAGA-3'   | 437       |
|               | Reverse | 5'-CAGAGCAGTGACGGGAACAG-3'   |           |
| VEGF          | Forward | 5'-CGGATCAAACCTCACCAAAG-3'   | 131       |
|               | Reverse | 5'-TTTCTCCGCTCTGAACAAGG-3'   |           |
| bFGF          | Forward | 5'-TCAAGGACCCCAAGCGGCTC-3'   | 170       |
|               | Reverse | 5'-GTACCGGTTGGCACACACTC-3'   |           |
| ChIP-MyoD     | Forward | 5'-GTCTCTCTGCCCTCCTTCCTA-3'  | 185       |
|               | Reverse | 5'-TATCCAGGGTAGCCTAAAAGCC-3' |           |
| ChIP-NC       | Forward | 5'-GCCCACCCAACCCCATCTT-3'    | 226       |
|               | Reverse | 5'-CCTCTTTCCTGAACTTGCCCT-3'  |           |

**Supplementary Table 2.** Primers for cloning

|                                                                                                                                                                                                                                                                               |
|-------------------------------------------------------------------------------------------------------------------------------------------------------------------------------------------------------------------------------------------------------------------------------|
| <p>pcDNA3.1-Sp1</p> <p>For: 5'-GGTACCCACCATGAGCGACCAAGATCACTCCAT-3'</p> <p>Rev: 5'-CTCGAGCCTTCTAATCTTAGAAACCATTGCCAC-3'</p>                                                                                                                                                   |
| <p>pGL4-MyoD promoter region</p> <p>For: 5'- GGTACCTTTTAATGATGATTCCCCTACTA-3'</p> <p>Rev: 5'- CTCGAGCGTGAGAGTCGTCTTAAC TTT -3'</p>                                                                                                                                            |
| <p>pGL4-MyoD promoter region- Δ1mt</p> <p>For: 5'- GGTACCTACACTCCTATTGGC -3'</p> <p>Rev: 5'- CTCGAG CGTGAGAGTCGTCTTAAC TTT -3'</p>                                                                                                                                            |
| <p>pGL4-MyoD promoter region- Δ2mt</p> <p>For: 5'- GGTACCTTTTAATGATGATTCCCCTACTA -3'</p> <p>Rev: 5'- CTCGAGGCCTCAAGCCAATAG -3'</p>                                                                                                                                            |
| <p>psiCHECK-2-Sp1-3'UTR-WT-Fragment A</p> <p>For: 5'-GGTACCGATTAGACACCCAGTGCCAGAGACA-3'</p> <p>Rev: 5'-CTCGAGTGAGCGGCTCACAGACAGGGAG-3'</p>                                                                                                                                    |
| <p>psiCHECK-2-Sp1-3'UTR-WT-Fragment B</p> <p>For: 5'-GGATCCAGTTACAAGCCGGCTTCGAGATGC-3'</p> <p>Rev: 5'-AAGCTTACAAAGGAGCTACAGACTACATTG-3'</p>                                                                                                                                   |
| <p>psiCHECK-2-Sp1-3'UTR-Fragment B – mt1 (3737–3765)</p> <p>For: 5'-GACGCTGCAGATCTTTGTA<u>AAATTAACCTA</u>-3'</p> <p>Rev: 5'-TAGGTTA<u>ATTT</u>TACAAAGATCTGCAGCGTC-3'</p> <p>(Underline indicates mutations introduced at the miR-92a seed region of the <i>Sp1</i> 3'UTR)</p> |

psiCHECK-2-Sp1-3'UTR-Fragment B – mt2 (4983–5011)

For: 5'-CCAGTTTATCTTTCTTAATACTAATCCGGACC-3'

Rev: 5'-GGTCCGGATTAGTATTAAGAAAGATAAACTGG-3'

(Underline indicates mutations introduced at the miR-92a seed region of the *Sp1* 3'UTR)

# Supplementary Figure S1

(A)

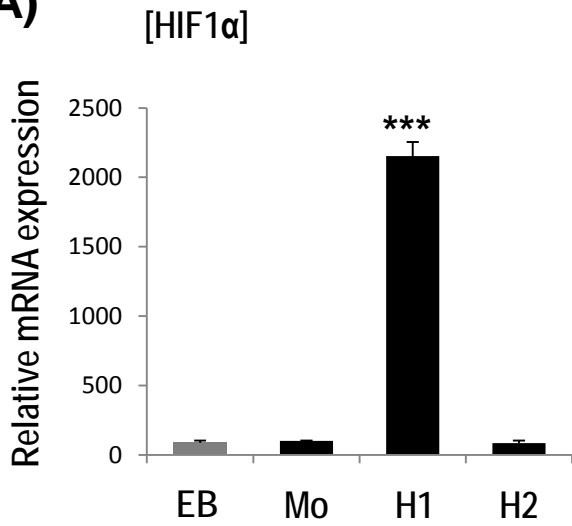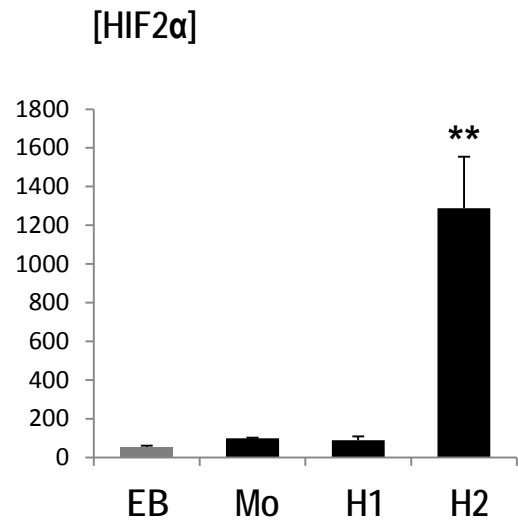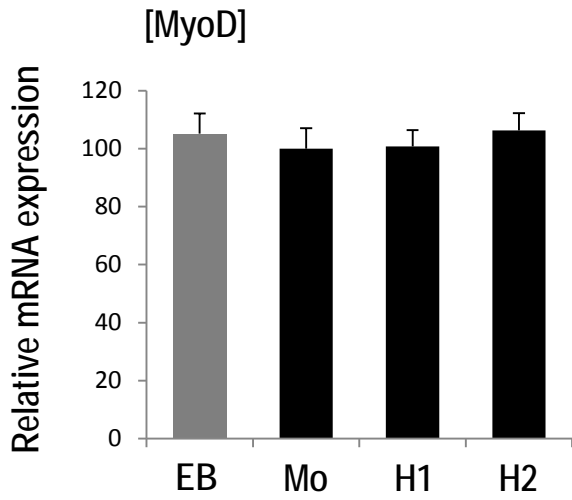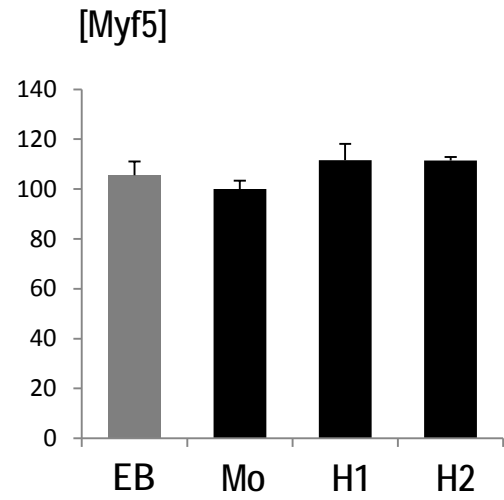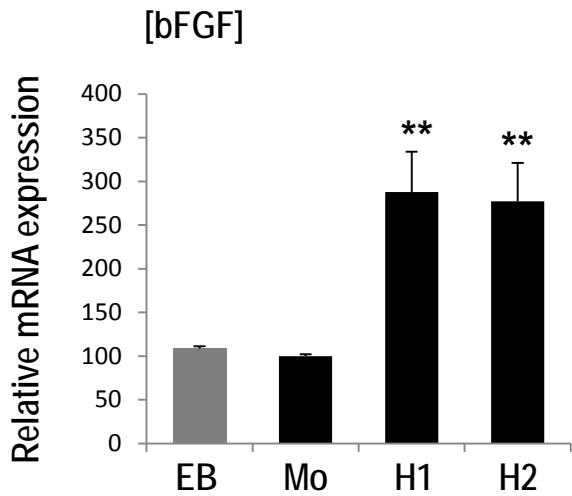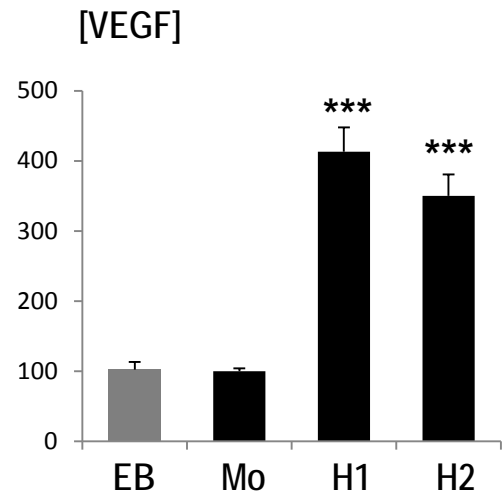

# Supplementary Figure S2

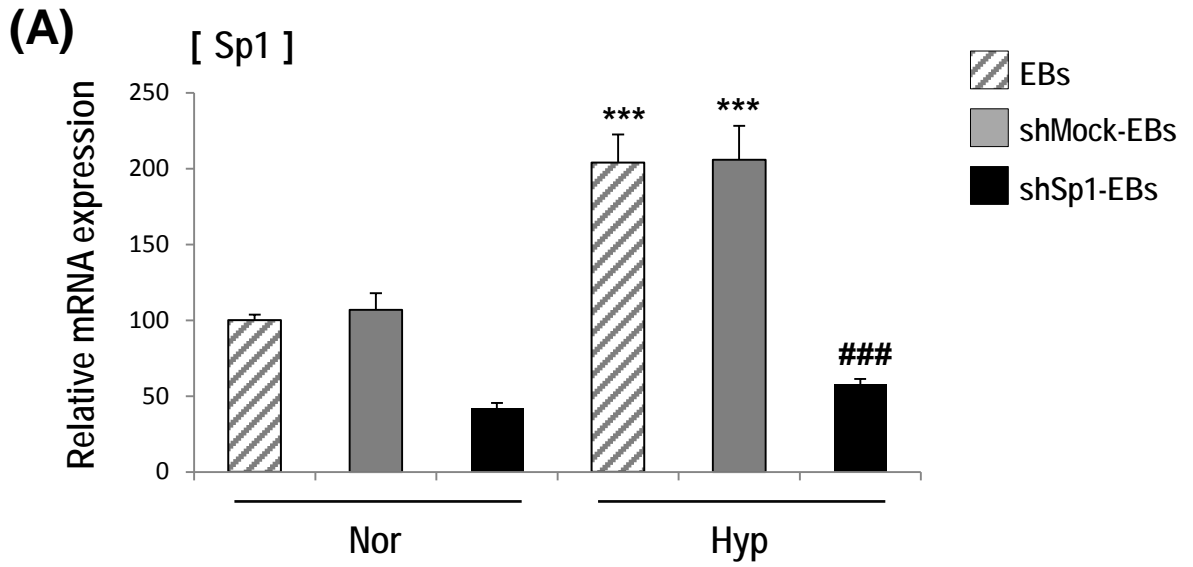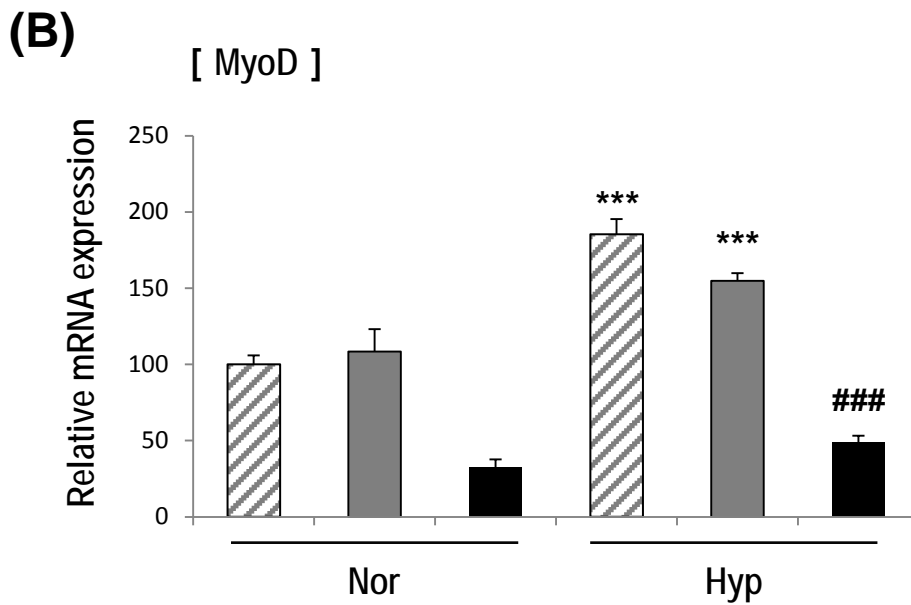

# Supplementary Figure S3

## (A) Sp1 mRNA

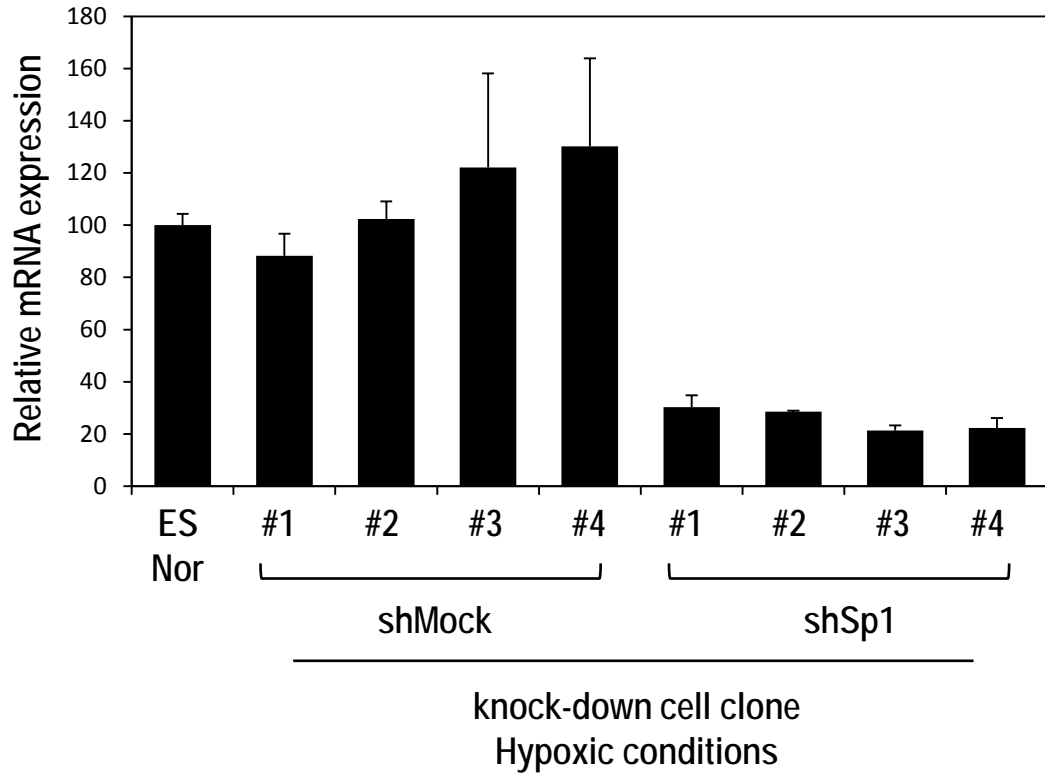

# Supplementary Figure S4

## (A) Sp1 protein

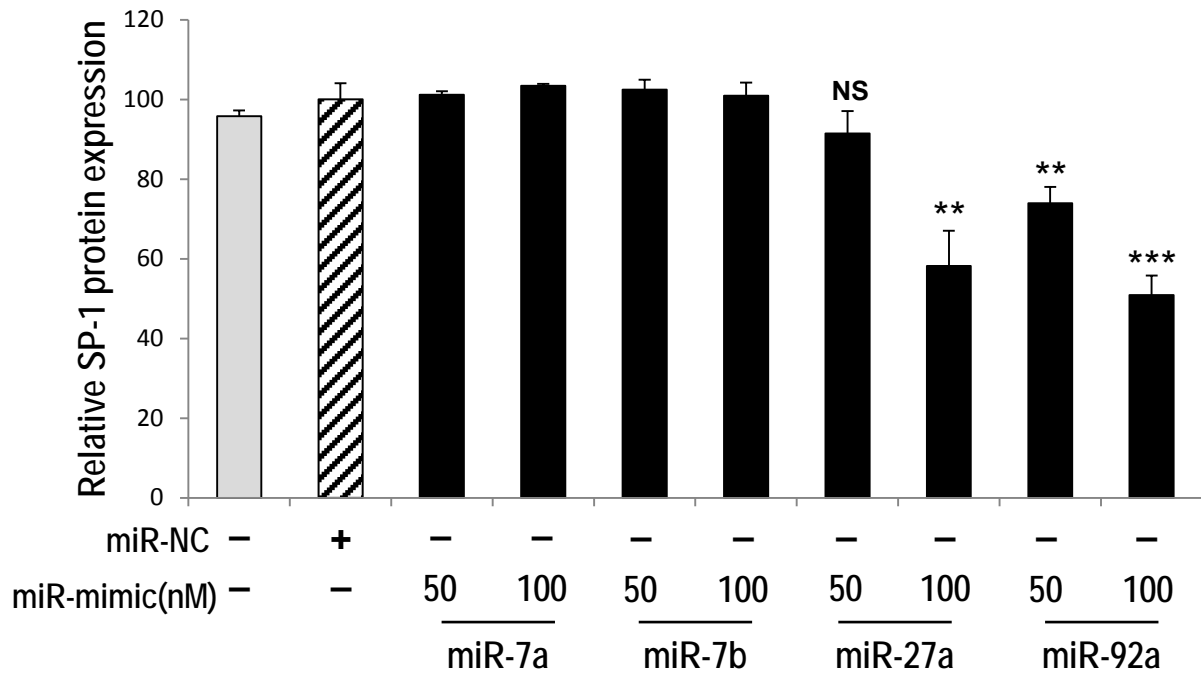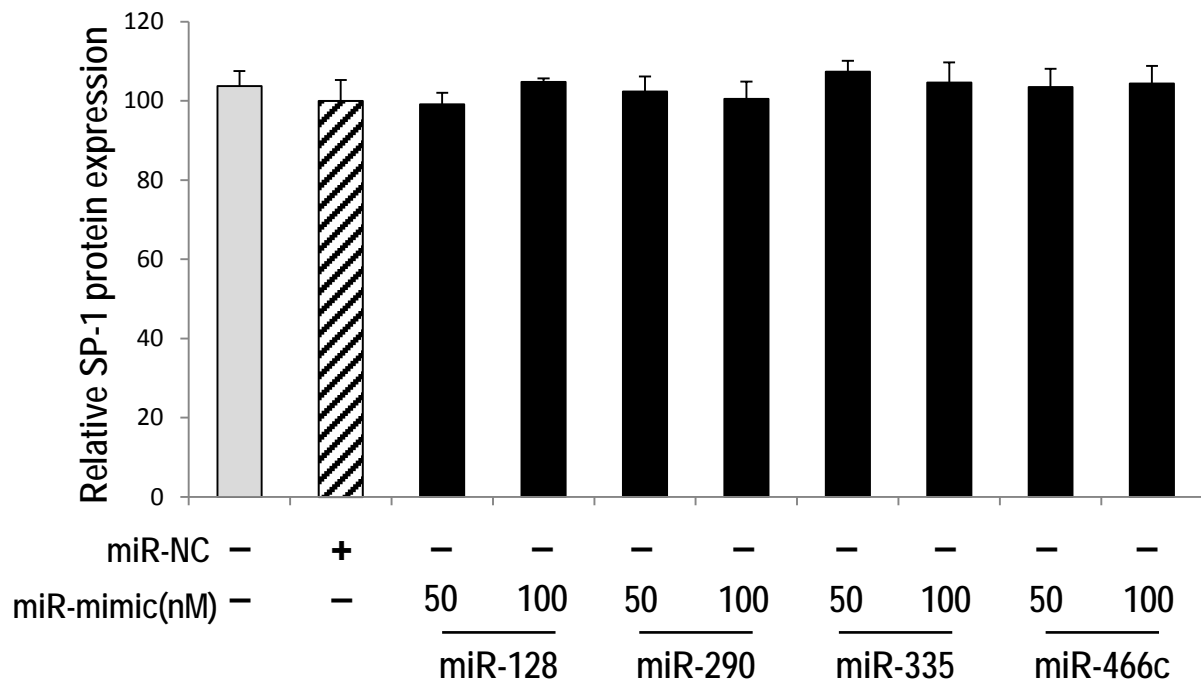

Supplement: mmc2.pdf [file mmc2.pdf]
